# Supplementary material for: Multidisciplinary Evaluation of Vulnerabilities: Communities in Northern Mexico
Source: MDPI journal article supplement (doi:10.3390/su151713077), 2023-08-30
Supplement: s1 [file s1]

**Table S1.** List of social and ecological indicators.

| Component  | Indicator                                                                       | Unit                                                          | Source             |
|------------|---------------------------------------------------------------------------------|---------------------------------------------------------------|--------------------|
| Ecological | Volumes of harvested production                                                 | ton year <sup>-1</sup>                                        | Peng et al., 2023  |
|            |                                                                                 | ton year <sup>-1</sup> per capita                             |                    |
|            | Harvested production of energy crops                                            | ton year <sup>-1</sup> per capita                             | Peng et al., 2023  |
|            | Harvest energy content                                                          | ton year <sup>-1</sup>                                        |                    |
|            | Total groundwater recharge                                                      | mm year <sup>-1</sup>                                         | Peng et al., 2023  |
|            | Groundwater quality                                                             | Index                                                         | Peng et al., 2023  |
|            | Proportion of renewable water withdrawn for public use                          | %                                                             | Peng et al., 2023  |
|            | Use of raw water                                                                | m <sup>3</sup>                                                | Peng et al., 2023  |
|            | Total water abstraction for public use                                          | m <sup>3</sup> or m <sup>3</sup> per capita                   | Peng et al., 2023  |
|            | Total water abstraction for industrial use                                      | m <sup>3</sup>                                                | Peng et al., 2023  |
|            | Total water abstraction for agriculture and industry use                        | m <sup>3</sup> per capita                                     | Peng et al., 2023  |
|            | Proportion of renewable water withdrawn for industrial use                      | %                                                             | Peng et al., 2023  |
|            | Total water abstraction for agricultural use                                    | m <sup>3</sup>                                                | Peng et al., 2023  |
|            | Proportion of renewable water withdrawn for agricultural use                    | %                                                             | Peng et al., 2023  |
|            | Quality of water on rangelands                                                  | Likert scale (interview) or official microbiological analysis | Alary et al., 2022 |
|            | Expenses for water access on rangelands                                         | Amount year <sup>-1</sup>                                     | Alary et al., 2022 |
|            | Primary production                                                              | -                                                             | Peng et al., 2023  |
|            | Surface area of crops                                                           | ha                                                            | Peng et al., 2023  |
|            | Months of feedstock over the duration of the season                             | Ratio                                                         | Alary et al., 2022 |
|            | Counts of animal per species received from or given to...                       | Animal heads                                                  | Alary et al., 2022 |
|            | Milk production                                                                 | liter day <sup>-1</sup>                                       | Alary et al., 2022 |
|            | Wool production                                                                 | kg                                                            | Alary et al., 2022 |
|            | Other animal services (animal traction, transportation, touristic riding, etc.) | hour                                                          | Alary et al., 2022 |
|            | Cash flow from animal products during the season                                | Amount                                                        | Alary et al., 2022 |
|            | Animal seasonal cash flow compared to family food and health expenses           | Ratio                                                         | Alary et al., 2022 |
|            | Genetic improvement                                                             | Counts of animals per breed                                   | Alary et al., 2022 |

|                                                       |                                                  |                    |
|-------------------------------------------------------|--------------------------------------------------|--------------------|
| Available selection pressure                          | % of the dominant breed                          | Alary et al., 2022 |
| Proportion of fodder crop area in the cultivated area | Ratio                                            | Alary et al., 2022 |
| Manure production                                     | Tons of Nitrogen                                 | Alary et al., 2022 |
| Proportion of cropping encroachment                   | ha                                               | Alary et al., 2022 |
| Animal products                                       | kg                                               | Peng et al., 2023  |
| Distance                                              | in km or hours                                   | Alary et al., 2022 |
| Seasonal fees to access pastureland                   | Amount<br>Eq. Kg grain day <sup>-1</sup>         | Alary et al., 2022 |
| Supplementation during the mobility                   | Animal <sup>-1</sup>                             | Alary et al., 2022 |
| Access to water supply on rangelands                  | Yes/no                                           | Alary et al., 2022 |
| Biomass production                                    | per year                                         | Alary et al., 2022 |
| Pasture quality                                       | Likert scale (interview)                         | Alary et al., 2022 |
| Species richness and diversity                        | Count of plant species                           | Alary et al., 2022 |
| Soil nutrients                                        | Soil organic matter content, soil pH,<br>Olsen P | Alary et al., 2022 |
| Dry matter availability from pastoral and crop areas  | tons                                             | Alary et al., 2022 |
| Dry matter requirement of the community herd          | tons                                             | Alary et al., 2022 |
| Length of growing period per plant species            | In months                                        | Alary et al., 2022 |
| Soil and water quality and availability               | Likert scale/analysis                            | Alary et al., 2022 |
| Total timber removal                                  | m <sup>3</sup> year <sup>-1</sup>                | Peng et al., 2023  |
| Timber growing stock                                  | m <sup>3</sup>                                   | Peng et al., 2023  |
| Aggregated index of nutrient recycling potential      | Index                                            | Peng et al., 2023  |
| Nitrogen fixation rate                                | kg ha <sup>-1</sup> year <sup>-1</sup>           | Peng et al., 2023  |
| Soil retention                                        | ton ha <sup>-1</sup> year <sup>-1</sup>          | Peng et al., 2023  |
| Increased harvest                                     | ha                                               | Peng et al., 2023  |
| Gross nitrogen balance                                | ton year <sup>-1</sup>                           | Peng et al., 2023  |
| Improved water and soil quality                       | Qualitative scale                                | Peng et al., 2023  |
| Pollination potential                                 | Index                                            | Peng et al., 2023  |
| Increase in yield                                     | kg ha <sup>-1</sup>                              | Peng et al., 2023  |
| Biodiversity Intactness Index                         | Index                                            | Peng et al., 2023  |
| Percentage of protected area                          | %                                                | Peng et al., 2023  |
| Removal of NO <sub>2</sub> by urban vegetation        | ton ha <sup>-1</sup> year <sup>-1</sup>          | Peng et al., 2023  |

|                                                                                                     |                                                       |                    |
|-----------------------------------------------------------------------------------------------------|-------------------------------------------------------|--------------------|
| Proportion of green areas in the high-density area of cities                                        | %                                                     | Peng et al., 2023  |
| PM <sub>10</sub> annual mean concentration                                                          | µg m <sup>-3</sup>                                    | Peng et al., 2023  |
| NO <sub>2</sub> annual mean concentration                                                           | µg m <sup>-3</sup>                                    | Peng et al., 2023  |
| The highest O <sub>3</sub> value based on daily max 8 h averages                                    | µg m <sup>-3</sup>                                    | Peng et al., 2023  |
| Water quality                                                                                       | Index                                                 | Peng et al., 2023  |
| Water Retention Index                                                                               | Index                                                 | Peng et al., 2023  |
| Water purification                                                                                  | -                                                     | Peng et al., 2023  |
| Groundwater production                                                                              | Recharge rate, mm ha <sup>-1</sup> year <sup>-1</sup> | Peng et al., 2023  |
| Rates of surface water drainage                                                                     | m <sup>3</sup> /s                                     | Peng et al., 2023  |
| Water Retention Index                                                                               | (dimensionless between 0 and 10)<br>Index             | Peng et al., 2023  |
| Capacity of ecosystems to avoid soil erosion                                                        | (dimensionless between 0 and 10)                      | Peng et al., 2023  |
| Surface area of forest with a protective function                                                   | ha                                                    | Peng et al., 2023  |
| Crop production deficit                                                                             | %                                                     | Peng et al., 2023  |
| Species richness                                                                                    | Index                                                 | Peng et al., 2023  |
| Habitat quality based on common birds                                                               | (dimensionless ratio)                                 | Peng et al., 2023  |
| Interpolated biodiversity status                                                                    | Index                                                 | Peng et al., 2023  |
| Net ecosystem productivity                                                                          | normalized index between 0 and 1                      | Peng et al., 2023  |
| Forest carbon potential                                                                             | Percent change, %                                     | Peng et al., 2023  |
| Annual CO <sub>2</sub> -eq emissions per ha                                                         | t ha <sup>-1</sup> year <sup>-1</sup>                 | Peng et al., 2023  |
| Annual CO <sub>2</sub> -eq emissions per capita                                                     | t capita <sup>-1</sup> year <sup>-1</sup>             | Peng et al., 2023  |
| Carbon-storing habitats                                                                             | ha or ha per capita                                   | Peng et al., 2023  |
| Overall coverage of forest                                                                          | %                                                     | Peng et al., 2023  |
| Potential increase in agricultural production to compensate the reduction due to the climate change | %                                                     | Peng et al., 2023  |
| Standard deviation of annual rainfall                                                               | mm per year                                           | Alary et al., 2022 |
| Biodiversity of landscapes                                                                          | -                                                     | Alary et al., 2022 |
| Magnitude of change of the natural biomass after a disturbance                                      | Variation of plant cover                              | Alary et al., 2022 |
| Percentage of windbreaks                                                                            | %                                                     | Peng et al., 2023  |
| Aggregated index generated through recreation and tourism statistics                                | Index                                                 | Peng et al., 2023  |
| Percentage of tourism to GDP                                                                        | %                                                     | Peng et al., 2023  |

|                                                                                                          |                                                                           |                     |
|----------------------------------------------------------------------------------------------------------|---------------------------------------------------------------------------|---------------------|
| Intensity of natural and cultural heritage protection based on the number of protected areas overlapping | km <sup>2</sup>                                                           | Peng et al., 2023   |
| Ecosystem exposed to flooding                                                                            | %                                                                         | Peng et al., 2023   |
| Seasonal rainfall                                                                                        | mm/month                                                                  | Alary et al., 2022  |
| Counts of animals per species                                                                            | Number                                                                    | Alary et al., 2022  |
| Area of fodder and grain crops for animals/total cultivated land                                         | Ratio                                                                     | Alary et al., 2022  |
| Animal protein intake in the daily ration                                                                | gr/day                                                                    | Alary et al., 2022  |
| Species composition (intra-herd diversity)                                                               | Counts of species in a herd                                               | Alary et al., 2022  |
| Species composition (intra-herd diversity)                                                               | Counts of animal breed                                                    | Alary et al., 2022  |
| Percentage of vegetation loss                                                                            | %                                                                         | Peng et al., 2023   |
| Percentage of deforested area                                                                            | %                                                                         | Peng et al., 2023 I |
| Percentage of area covered by "problem soils"                                                            | %                                                                         | Peng et al., 2023   |
| Increased use of chemicals and fertilizers                                                               | (qualitative/quantitative)                                                | Peng et al., 2023   |
| Water clarity                                                                                            | Turbidity, Secchi depth                                                   | Peng et al., 2023   |
| Normalized Difference Vegetation Index                                                                   | NDVI                                                                      | Peng et al., 2023   |
| Land reclamation rate                                                                                    | km <sup>2</sup> /year                                                     | Peng et al., 2023   |
| Degree of pollution in sediments                                                                         | (Heavy metals, etc.) (proxy – concentration of heavy metals in sediments) | Peng et al., 2023   |
| Forest connectivity                                                                                      | Index                                                                     | Peng et al., 2023   |
| River connectivity                                                                                       | Index                                                                     | Peng et al., 2023   |
| River net density (defined as river length divided by land area)                                         | Index                                                                     | Peng et al., 2023   |
| Ecosystem Functionality Index (EFI)                                                                      | Index                                                                     | Peng et al., 2023   |
| Mean species abundance                                                                                   | MSA                                                                       | Peng et al., 2023   |
| Percentage of change in land use (agriculture, vegetation, fishery, settlement)                          | %                                                                         | Peng et al., 2023   |
| Number of aquatic environmental reservoirs                                                               | n                                                                         | Peng et al., 2023   |
| Policies supporting biodiversity conservation                                                            | Yes/no                                                                    | Peng et al., 2023   |
| Percentage of government expenditure on environmental protection                                         | %                                                                         | Peng et al., 2023   |
| Percentage of area covered by Wetlands of International Importance (Ramsar Sites)                        | %                                                                         | Peng et al., 2023   |
| Participation in treaties, such as Convention on Biological Diversity                                    | Yes/no                                                                    | Peng et al., 2023   |

|        |                                                                                         |                           |                    |
|--------|-----------------------------------------------------------------------------------------|---------------------------|--------------------|
|        | Percentage of nature reserves and wetlands                                              | %                         | Peng et al., 2023  |
|        | Percentage of forest area restored                                                      | %                         | Peng et al., 2023  |
|        | Rate of afforestation area                                                              | ha                        | Peng et al., 2023  |
|        | Proportion of drought tolerant crops                                                    | % of crop production      | Peng et al., 2023  |
|        | Percent of area with intensive/extensive agriculture in floodplain                      | % of agriculture land     | Peng et al., 2023  |
|        | Time needed for the natural vegetation to return to a certain percentage of plant cover | -                         | Alary et al., 2022 |
|        | Restoration period of the natural vegetation after a disturbance                        | Counts of months          | Alary et al., 2022 |
|        | Average of monthly precipitation                                                        |                           | Peng et al., 2023  |
|        | Water level                                                                             | cm                        | Peng et al., 2023  |
|        | Hazard duration/days                                                                    | Days                      | Peng et al., 2023  |
|        | Probability of occurrence                                                               |                           | Peng et al., 2023  |
|        | Ecosystem exposed to storm surge                                                        | %                         | Peng et al., 2023  |
|        | Ecosystem exposed to drought                                                            | %                         | Peng et al., 2023  |
| Social | Aggregated index generated through recreation and tourism statistics                    | Index                     | Peng et al., 2023  |
|        | Experience: participation in recreational activities                                    | n, %                      | Peng et al., 2023  |
|        |                                                                                         | or outdoor activities (n) |                    |
|        | Share of high-provision, easily accessible land in the recreation opportunity spectrum  | %                         | Peng et al., 2023  |
|        | Surface area of special protection area                                                 | ha                        | Peng et al., 2023  |
|        | Surface area of sites of community importance                                           | ha                        | Peng et al., 2023  |
|        | Employment (n); tourism revenue                                                         | #                         | Peng et al., 2023  |
|        | Employment in tourism and other aesthetic activities                                    | %                         |                    |
|        | Characteristics of living systems that are resonant in terms of culture or heritage     | km <sup>2</sup>           | Peng et al., 2023  |
|        | Percentage of population exposed to flooding                                            | %                         | Peng et al., 2023  |
|        | Proportion of GDP in primary sector                                                     | %                         | Peng et al., 2023  |
|        | Livestock net income                                                                    | Amount                    | Alary et al., 2022 |
|        | Livestock annual net income/basic annual family expenses                                | Ratio                     | Alary et al., 2022 |
|        | List of livestock assets and income owned or/and managed by women                       | Counts of tasks           | Alary et al., 2022 |
|        | Crop income compared to total annual family income                                      | Ratio                     | Alary et al., 2022 |

|                                                                                                                                                                                                       |                                                      |                    |
|-------------------------------------------------------------------------------------------------------------------------------------------------------------------------------------------------------|------------------------------------------------------|--------------------|
| Out-of-farm income compared to total annual family income                                                                                                                                             | Ratio                                                | Alary et al., 2022 |
| Proportion of houses with poor facilities that are more fragile to climate change and hazards                                                                                                         | %                                                    | Peng et al., 2023  |
| Number of conflicts on land                                                                                                                                                                           | Number                                               | Alary et al., 2022 |
| Carrying capacity on rangelands                                                                                                                                                                       | TLU*per km <sup>2</sup><br>Tons of dry matter per ha | Alary et al., 2022 |
| Proportion of critical transportation sector                                                                                                                                                          | %                                                    | Peng et al., 2023  |
| Proportion of critical transportation sector: main road, main tunnel, subway, port, airport; water sector; energy sector; information and communication sector; civil administration buildings sector |                                                      |                    |
| Percentage of population exposed to drought                                                                                                                                                           | %                                                    | Peng et al., 2023  |
| Distance to market for animal transaction                                                                                                                                                             | km                                                   | Alary et al., 2022 |
| Pastoral institutions and organizations                                                                                                                                                               | Count                                                | Alary et al., 2022 |
| Remittance from migrants                                                                                                                                                                              | Amount                                               | Alary et al., 2022 |
| Emigration rate                                                                                                                                                                                       | Ratio                                                | Alary et al., 2022 |
| Percentage of population without access to electricity                                                                                                                                                | %                                                    | Peng et al., 2023  |
| Percentage of households without access to irrigation                                                                                                                                                 | %                                                    | Peng et al., 2023  |
| Percentage of population without access to (improved) sanitation                                                                                                                                      | %                                                    | Peng et al., 2023  |
| Percentage of population without access to clean water                                                                                                                                                | %                                                    | Peng et al., 2023  |
| Percentage of population living in informal settlements                                                                                                                                               | %                                                    | Peng et al., 2023  |
| Percentage of households that live in rented houses                                                                                                                                                   | %                                                    | Peng et al., 2023  |
| The household proportion with person aged 65 and older                                                                                                                                                | %                                                    | Peng et al., 2023  |
| Percentage of reinforced/elevated houses                                                                                                                                                              | %                                                    | Peng et al., 2023  |
| Percentage of households without official land title                                                                                                                                                  | %                                                    | Peng et al., 2023  |
| Percentage of houses with more than one floor                                                                                                                                                         | %                                                    | Peng et al., 2023  |
| Credit access for livestock activity                                                                                                                                                                  | Yes/no                                               | Alary et al., 2022 |
| Fodder seed supply                                                                                                                                                                                    | Yes/no                                               | Alary et al., 2022 |
| Proportion of vaccinated animals                                                                                                                                                                      | % of the herds                                       | Alary et al., 2022 |
| Animal value stock (animal asset valued at selling price) per family member (compared to the poverty line)                                                                                            | Ratio                                                | Alary et al., 2022 |
| Percentage of population living in poorly constructed houses                                                                                                                                          | %                                                    | Peng et al., 2023  |
| Percentage of illiterate population                                                                                                                                                                   | %                                                    | Peng et al., 2023  |

|                                                                              |                                |                    |
|------------------------------------------------------------------------------|--------------------------------|--------------------|
| Percentage of primary industry to GDP                                        | %                              | Peng et al., 2023  |
| Population density                                                           | Population per km <sup>2</sup> | Peng et al., 2023  |
| Percentage of female-headed households                                       | %                              | Peng et al., 2023  |
| Travel time to closest city                                                  | mins                           | Peng et al., 2023  |
| Percentage of the population with disabilities                               | %                              | Peng et al., 2023  |
| Percentage malnourished population                                           | %                              | Peng et al., 2023  |
| Percentage of population with chronic illnesses                              | %                              | Peng et al., 2023  |
| Proportion of families below poverty line in total households                |                                | Peng et al., 2023  |
| Dependency ratio                                                             | %                              | Peng et al., 2023  |
| GINI index                                                                   | 0-100                          | Peng et al., 2023  |
| Dependency on agriculture /forestry /fisheries for livelihood                | %                              | Peng et al., 2023  |
| Ratio of afforestation coverage areas in the city                            |                                | Peng et al., 2023  |
| Prevalence of population who experience violence                             | %                              | Peng et al., 2023  |
| Prevalence of population affected by armed conflict                          | %                              | Peng et al., 2023  |
| Number of fatalities caused by terrorists per 10,000 per year                |                                | Peng et al., 2023  |
| Per capita income                                                            |                                | Peng et al., 2023  |
| Per capita GDP per unit area                                                 |                                | Peng et al., 2023  |
| Average years of education                                                   | year                           | Peng et al., 2023  |
| Ratio of the population with college/university degree or higher             | %                              | Peng et al., 2023  |
| Percentage of households without individual means of transportation          | %                              | Peng et al., 2023  |
| Percentage of households without gross savings                               | %                              | Peng et al., 2023  |
| Percentage of households without access to bank loans/(micro-)credits        | %                              | Peng et al., 2023  |
| Percentage of households without any insurance—excl. health insurance        | %                              | Peng et al., 2023  |
| Animal stock per veterinarian in the community                               | Number of animals /vet         | Alary et al., 2022 |
| Distance of veterinary services from family house                            | km                             | Alary et al., 2022 |
| Distance of veterinary service from rangeland in the territory of attachment | km                             | Alary et al., 2022 |
| Distance of veterinary pharmacy from family house                            | km                             | Alary et al., 2022 |
| The average cost of veterinary medicine                                      | amount animal <sup>-1</sup>    | Alary et al., 2022 |
| Percentage of population without a health insurance                          | %                              | Peng et al., 2023  |
| Net income per person in working age (compared to the minimum wage)          | Ratio                          | Alary et al., 2022 |

|                                                                                                                                                                                     |                                       |                    |
|-------------------------------------------------------------------------------------------------------------------------------------------------------------------------------------|---------------------------------------|--------------------|
| Density of strong ties within the local social network                                                                                                                              | Contacts par category of stakeholders | Alary et al., 2022 |
| Density of links within the extended networks (administration, traders, etc.)                                                                                                       | Contacts par category of stakeholders | Alary et al., 2022 |
| Equipment: telephone, internet, road, electricity, etc.                                                                                                                             | Counts of equipment                   | Alary et al., 2022 |
| Proximity                                                                                                                                                                           | km                                    | Alary et al., 2022 |
| Number of visits/year                                                                                                                                                               | Number                                | Alary et al., 2022 |
| Elasticity of animal product demand                                                                                                                                                 | Ratio                                 | Alary et al., 2022 |
| Animal supply dynamic                                                                                                                                                               | % variation                           | Alary et al., 2022 |
| Household size                                                                                                                                                                      | Number                                | Alary et al., 2022 |
| Working-age persons in the household                                                                                                                                                | Number                                | Alary et al., 2022 |
| Household dependency ratio                                                                                                                                                          | Ratio                                 | Alary et al., 2022 |
| Number of people with higher education                                                                                                                                              | Number                                | Alary et al., 2022 |
| Value of animal stock (valued at the selling price) per children (transmissibility)                                                                                                 |                                       | Alary et al., 2022 |
| Existence of early warning systems                                                                                                                                                  | Yes/no                                | Peng et al., 2023  |
| Volume of water storage in a safe reservoir/container                                                                                                                               | m <sup>3</sup>                        | Peng et al., 2023  |
| Number of hospital beds per 1000 inhabitants                                                                                                                                        | #                                     | Peng et al., 2023  |
| Access to shelter places (density of schools)                                                                                                                                       | Index                                 | Peng et al., 2023  |
| Percentage of households without access to waste/water treatment                                                                                                                    | %                                     | Peng et al., 2023  |
| Drainage system: average length of drainage network                                                                                                                                 | %                                     | Peng et al., 2023  |
| Access to emergency places (density of hospitals, fire bridges, police stations)                                                                                                    |                                       | Peng et al., 2023  |
| Density of transportation network: combined measure of distance to nearest station, density of road and rail networks, density of bus stations and ports for transportation service | Index                                 | Peng et al., 2023  |
| Public health expenditure                                                                                                                                                           | % of GDP                              | Peng et al., 2023  |
| Private health expenditure                                                                                                                                                          | % of GDP                              | Peng et al., 2023  |
| Density of aid projects                                                                                                                                                             | Index                                 | Peng et al., 2023  |
| Percentage of population who has experienced hazard(s) in the past 10 years                                                                                                         | %                                     | Peng et al., 2023  |
| Foreign direct investment                                                                                                                                                           | % of GDP                              | Peng et al., 2023  |
| Percentage of farmers who use different crop varieties                                                                                                                              | %                                     | Peng et al., 2023  |
| Number of income-generating activities per household                                                                                                                                | Number                                | Peng et al., 2023  |



|                                                                                        |                            |                    |
|----------------------------------------------------------------------------------------|----------------------------|--------------------|
| Existence of hazard/vulnerability/risk map                                             | Yes/no                     | Peng et al., 2023  |
| Existence of integrated development plans: conservation, protection, land use planning | Yes/no                     | Peng et al., 2023  |
| Existence of adaptation policies/strategies                                            | Yes/no                     | Peng et al., 2023  |
| Percentage of GDP spent on innovation and research                                     | %                          | Peng et al., 2023  |
| Amount of subsidies par animal at the territorial level                                | amount animal <sup>1</sup> | Alary et al., 2022 |
| Percentage of reproductive females in the herd per animal species                      | Ratio                      | Alary et al., 2022 |

**Table S2.** Selection of indicators by selection criteria.

| Component  | General indicators                                         | Geographical contexts  |                              |                   |                       | Alignment with vulnerability dimensions |     |    |    |    |    |                  |
|------------|------------------------------------------------------------|------------------------|------------------------------|-------------------|-----------------------|-----------------------------------------|-----|----|----|----|----|------------------|
|            |                                                            | Paso del Norte (urban) | Nuevas Delicias (peri-urban) | La Regina (rural) | Basaseachi (forestry) | CC                                      | Rop | LB | GA | UH | SM | Total dimensions |
| Ecological | Volumes of harvested production                            | 0                      | 1                            | 1                 | 1                     | 1                                       | 1   | 1  | 0  | 0  | 0  | 3                |
|            | Harvested production of energy crops                       | 0                      | 1                            | 1                 | 1                     | 1                                       | 1   | 1  | 0  | 0  | 0  | 3                |
|            | Total groundwater recharge                                 | 1                      | 1                            | 1                 | 1                     | 1                                       | 1   | 0  | 0  | 0  | 0  | 2                |
|            | Groundwater quality                                        | 1                      | 1                            | 1                 | 1                     | 1                                       | 1   | 0  | 0  | 0  | 0  | 2                |
|            | Proportion of renewable water withdrawn for public use     | 1                      | 1                            | 1                 | 1                     | 1                                       | 1   | 0  | 0  | 0  | 0  | 2                |
|            | Use of raw water                                           | 1                      | 1                            | 1                 | 1                     | 1                                       | 1   | 0  | 0  | 0  | 0  | 2                |
|            | Total water abstraction for public use                     | 1                      | 1                            | 1                 | 1                     | 1                                       | 1   | 0  | 0  | 0  | 0  | 2                |
|            | Total water abstraction for industrial use                 | 1                      | 1                            | 1                 | 1                     | 1                                       | 1   | 0  | 0  | 0  | 0  | 2                |
|            | Proportion of renewable water withdrawn for industrial use | 0                      | 1                            | 1                 | 1                     | 1                                       | 1   | 0  | 0  | 0  | 0  | 2                |
|            | Total water abstraction for agricultural use               | 0                      | 1                            | 1                 | 1                     | 1                                       | 1   | 0  | 0  | 0  | 0  | 2                |

|                                                                                 |   |   |   |   |   |   |   |   |   |   |   |
|---------------------------------------------------------------------------------|---|---|---|---|---|---|---|---|---|---|---|
| Proportion of renewable water withdrawn for agricultural use                    | 0 | 1 | 1 | 1 | 1 | 1 | 0 | 0 | 0 | 0 | 2 |
| Quality of water on rangelands                                                  | 0 | 1 | 1 | 1 | 1 | 1 | 0 | 0 | 0 | 0 | 2 |
| Expenses for water access on rangelands                                         | 0 | 1 | 1 | 1 | 1 | 1 | 0 | 0 | 0 | 0 | 2 |
| Primary production                                                              | 0 | 1 | 1 | 1 | 0 | 1 | 1 | 0 | 0 | 0 | 2 |
| Surface area of crops                                                           | 0 | 1 | 1 | 1 | 0 | 1 | 1 | 0 | 0 | 0 | 2 |
| Months of feedstock over the duration of the season                             | 1 | 1 | 1 | 1 | 0 | 1 | 1 | 0 | 0 | 0 | 2 |
| Counts of animal per species received from or given to or                       | 0 | 1 | 1 | 1 | 1 | 1 | 1 | 0 | 0 | 0 | 3 |
| Counts of animals per species                                                   |   |   |   |   |   |   |   |   |   |   |   |
| Milk production                                                                 | 0 | 1 | 1 | 1 | 0 | 1 | 1 | 0 | 0 | 0 | 2 |
| Wool production                                                                 | 0 | 1 | 1 | 1 | 0 | 1 | 1 | 0 | 0 | 0 | 2 |
| Other animal services (animal traction, transportation, touristic riding, etc.) | 1 | 1 | 1 | 1 | 0 | 1 | 1 | 0 | 0 | 0 | 2 |
| Cash flow from animal products during the season                                | 1 | 1 | 1 | 1 | 0 | 1 | 1 | 0 | 0 | 0 | 2 |
| Animal seasonal cash flow compared to family food and health expenses.          | 1 | 1 | 1 | 1 | 0 | 1 | 1 | 0 | 0 | 0 | 2 |
| Genetic improvement                                                             | 0 | 1 | 1 | 1 | 0 | 1 | 1 | 0 | 0 | 0 | 2 |
| Available selection pressure                                                    | 0 | 1 | 1 | 1 | 0 | 1 | 1 | 0 | 0 | 0 | 2 |
| Proportion of fodder crop area in the cultivated area                           | 0 | 1 | 1 | 1 | 0 | 1 | 1 | 0 | 0 | 0 | 2 |
| Manure production                                                               | 1 | 1 | 1 | 1 | 1 | 1 | 1 | 0 | 0 | 0 | 3 |
| Proportion of cropping encroachment                                             | 0 | 1 | 1 | 1 | 0 | 1 | 1 | 0 | 0 | 0 | 2 |
| Animal products                                                                 | 1 | 1 | 1 | 1 | 0 | 1 | 1 | 0 | 0 | 0 | 2 |
| Distance                                                                        | 1 | 1 | 1 | 1 | 0 | 0 | 0 | 0 | 0 | 1 | 1 |
| Seasonal fees to access pastureland                                             | 1 | 1 | 1 | 1 | 0 | 1 | 1 | 0 | 0 | 0 | 2 |
| Supplementation during the mobility                                             | 1 | 1 | 1 | 1 | 0 | 1 | 1 | 0 | 0 | 0 | 2 |
| Access to water supply on rangelands                                            | 1 | 1 | 1 | 1 | 1 | 1 | 1 | 0 | 0 | 0 | 3 |
| Biomass production                                                              | 1 | 1 | 1 | 1 | 0 | 1 | 1 | 0 | 0 | 0 | 2 |
| Pasture quality                                                                 | 1 | 1 | 1 | 1 | 1 | 1 | 1 | 0 | 0 | 0 | 3 |

|                                                                                |   |   |   |   |   |   |   |   |   |   |   |
|--------------------------------------------------------------------------------|---|---|---|---|---|---|---|---|---|---|---|
| Species richness and diversity                                                 | 1 | 1 | 1 | 1 | 1 | 1 | 0 | 0 | 0 | 0 | 2 |
| Soil nutrients                                                                 | 0 | 1 | 1 | 1 | 1 | 1 | 1 | 0 | 0 | 0 | 3 |
| Dry matter availability from pastoral and crop areas                           | 0 | 1 | 1 | 1 | 0 | 1 | 1 | 0 | 0 | 0 | 2 |
| Dry matter requirement of the community herd                                   | 0 | 1 | 1 | 1 | 1 | 1 | 1 | 0 | 0 | 0 | 3 |
| Length of growing period per plant species                                     | 0 | 1 | 1 | 1 | 1 | 1 | 1 | 0 | 0 | 0 | 3 |
| Improved water and soil quality                                                | 1 | 1 | 1 | 1 | 1 | 1 | 1 | 0 | 0 | 0 | 3 |
| Total timber removal                                                           | 0 | 1 | 1 | 1 | 1 | 1 | 1 | 0 | 0 | 0 | 3 |
| Timber growing stock                                                           | 0 | 1 | 1 | 1 | 1 | 1 | 1 | 0 | 0 | 0 | 3 |
| Aggregated index of nutrient recycling potential as function of substrate type | 0 | 1 | 1 | 1 | 1 | 1 | 1 | 0 | 0 | 0 | 3 |
| Nitrogen fixation rate                                                         | 0 | 1 | 1 | 1 | 1 | 1 | 1 | 0 | 0 | 0 | 3 |
| Soil retention                                                                 | 0 | 1 | 1 | 1 | 1 | 1 | 1 | 0 | 0 | 0 | 3 |
| Increased harvest                                                              | 0 | 1 | 1 | 1 | 1 | 1 | 1 | 0 | 0 | 0 | 3 |
| Gross nitrogen balance                                                         | 0 | 1 | 1 | 1 | 1 | 1 | 1 | 0 | 0 | 0 | 3 |
| Pollination potential                                                          | 1 | 1 | 1 | 1 | 1 | 1 | 1 | 0 | 0 | 0 | 3 |
| Increase in yield                                                              | 1 | 1 | 1 | 1 | 1 | 1 | 1 | 0 | 0 | 0 | 3 |
| Biodiversity Intactness Index                                                  | 1 | 1 | 1 | 1 | 1 | 0 | 0 | 0 | 0 | 0 | 1 |
| Percentage of protected area                                                   | 1 | 1 | 1 | 1 | 1 | 0 | 0 | 0 | 0 | 0 | 1 |
| Removal of NO <sub>2</sub> by urban vegetation                                 | 1 | 1 | 1 | 1 | 1 | 0 | 0 | 1 | 1 | 0 | 3 |
| Proportion of green areas in the high-density area of cities                   | 1 | 1 | 1 | 1 | 1 | 0 | 0 | 1 | 1 | 0 | 3 |
| PM <sub>10</sub> annual mean concentration                                     | 1 | 1 | 1 | 1 | 1 | 0 | 0 | 1 | 1 | 0 | 3 |
| NO <sub>2</sub> annual mean concentration                                      | 1 | 1 | 1 | 1 | 1 | 0 | 0 | 1 | 1 | 0 | 3 |
| The highest O <sub>3</sub> value based on daily max 8 h averages               | 1 | 1 | 1 | 1 | 1 | 0 | 0 | 1 | 1 | 0 | 3 |
| Water quality                                                                  | 1 | 1 | 1 | 1 | 1 | 1 | 0 | 0 | 0 | 0 | 2 |
| Water Retention Index                                                          | 1 | 1 | 1 | 1 | 1 | 1 | 0 | 1 | 1 | 0 | 4 |
| Water purification                                                             | 1 | 1 | 1 | 1 | 1 | 1 | 0 | 1 | 1 | 0 | 4 |
| Groundwater production                                                         | 1 | 1 | 1 | 1 | 1 | 1 | 0 | 0 | 0 | 0 | 2 |

|                                                                                                          |   |   |   |   |   |   |   |   |   |   |   |
|----------------------------------------------------------------------------------------------------------|---|---|---|---|---|---|---|---|---|---|---|
| Rates of surface water drainage                                                                          | 1 | 1 | 1 | 1 | 1 | 1 | 0 | 1 | 1 | 0 | 4 |
| Capacity of ecosystems to avoid soil erosion                                                             | 1 | 1 | 1 | 1 | 1 | 1 | 0 | 0 | 0 | 0 | 2 |
| Surface area of forest with a protective function                                                        | 1 | 1 | 1 | 1 | 1 | 1 | 0 | 0 | 0 | 0 | 2 |
| Crop production deficit                                                                                  | 0 | 1 | 1 | 1 | 0 | 1 | 1 | 0 | 0 | 0 | 2 |
| Habitat quality based on common birds                                                                    | 1 | 1 | 1 | 1 | 1 | 1 | 0 | 0 | 0 | 0 | 2 |
| Interpolated biodiversity status                                                                         | 1 | 1 | 1 | 1 | 1 | 1 | 0 | 0 | 0 | 0 | 2 |
| Net ecosystem productivity                                                                               | 1 | 1 | 1 | 1 | 1 | 1 | 1 | 0 | 0 | 0 | 3 |
| Forest carbon potential                                                                                  | 0 | 1 | 1 | 1 | 1 | 1 | 1 | 0 | 0 | 0 | 3 |
| Annual CO <sub>2</sub> -eq emissions per ha                                                              | 1 | 1 | 1 | 1 | 1 | 1 | 1 | 0 | 0 | 0 | 3 |
| Annual CO <sub>2</sub> -eq emissions per capita                                                          | 1 | 1 | 1 | 1 | 1 | 1 | 1 | 0 | 0 | 0 | 3 |
| Carbon-storing habitats                                                                                  | 1 | 1 | 1 | 1 | 1 | 1 | 1 | 0 | 0 | 0 | 3 |
| Overall coverage of forest                                                                               | 0 | 1 | 1 | 1 | 1 | 1 | 1 | 0 | 0 | 0 | 3 |
| Potential increase in agricultural production to compensate the reduction due to the climate change      | 0 | 1 | 1 | 0 | 1 | 1 | 1 | 0 | 0 | 0 | 3 |
| Standard deviation of annual rainfall                                                                    | 1 | 1 | 1 | 1 | 1 | 1 | 0 | 0 | 0 | 0 | 2 |
| Biodiversity of landscapes                                                                               | 1 | 1 | 1 | 1 | 1 | 1 | 0 | 0 | 0 | 0 | 2 |
| Magnitude of change of the natural biomass after a disturbance                                           | 1 | 1 | 1 | 1 | 1 | 1 | 0 | 0 | 0 | 0 | 2 |
| Percentage of windbreaks                                                                                 | 1 | 1 | 1 | 1 | 1 | 1 | 0 | 0 | 0 | 0 | 2 |
| Percentage of tourism to GDP                                                                             | 0 | 0 | 1 | 1 | 0 | 0 | 1 | 0 | 0 | 0 | 1 |
| Intensity of natural and cultural heritage protection based on the number of protected areas overlapping | 1 | 1 | 1 | 1 | 1 | 1 | 0 | 0 | 0 | 0 | 2 |
| Ecosystem exposed to flooding                                                                            | 1 | 1 | 1 | 1 | 1 | 1 | 0 | 1 | 1 | 0 | 4 |
| Seasonal rainfall                                                                                        | 1 | 1 | 1 | 1 | 1 | 1 | 0 | 0 | 0 | 0 | 2 |
| Area of fodder and grain crops for animals/total cultivated land                                         | 0 | 1 | 1 | 1 | 1 | 1 | 1 | 0 | 0 | 0 | 3 |
| Animal protein intake in the daily ration                                                                | 1 | 1 | 1 | 1 | 0 | 0 | 0 | 1 | 1 | 0 | 2 |

|                                                                                   |   |   |   |   |   |   |   |   |   |   |   |
|-----------------------------------------------------------------------------------|---|---|---|---|---|---|---|---|---|---|---|
| Species composition (intra-herd diversity)                                        | 0 | 1 | 1 | 1 | 0 | 1 | 1 | 0 | 0 | 0 | 2 |
| Percentage of vegetation loss                                                     | 1 | 1 | 1 | 1 | 1 | 1 | 0 | 0 | 0 | 0 | 2 |
| Percentage of deforested area                                                     | 1 | 1 | 1 | 1 | 1 | 1 | 1 | 0 | 0 | 0 | 3 |
| Percentage of area covered by "problem soils"                                     | 1 | 1 | 1 | 1 | 1 | 1 | 1 | 0 | 0 | 0 | 3 |
| Increased use of chemicals and fertilizers                                        | 0 | 1 | 1 | 1 | 1 | 1 | 1 | 1 | 1 | 0 | 5 |
| Water clarity                                                                     | 1 | 1 | 1 | 1 | 1 | 1 | 1 | 1 | 1 | 0 | 5 |
| Normalized Difference Vegetation Index                                            | 1 | 1 | 1 | 1 | 1 | 1 | 0 | 0 | 0 | 0 | 2 |
| Land reclamation rate                                                             | 1 | 1 | 1 | 1 | 1 | 1 | 0 | 1 | 1 | 0 | 4 |
| Degree of pollution in sediments                                                  | 1 | 1 | 1 | 1 | 1 | 1 | 0 | 1 | 1 | 0 | 4 |
| Forest connectivity                                                               | 0 | 1 | 1 | 1 | 1 | 1 | 1 | 0 | 0 | 0 | 3 |
| River connectivity                                                                | 1 | 1 | 1 | 1 | 1 | 1 | 1 | 1 | 1 | 0 | 5 |
| River net density (defined as river length divided by land area)                  | 1 | 1 | 1 | 1 | 1 | 1 | 1 | 1 | 1 | 0 | 5 |
| Ecosystem Functionality Index (EFI)                                               | 1 | 1 | 1 | 1 | 1 | 1 | 1 | 1 | 1 | 0 | 5 |
| Mean species abundance                                                            | 1 | 1 | 1 | 1 | 1 | 1 | 0 | 0 | 0 | 0 | 2 |
| Percentage of change in land use (agriculture, vegetation, settlement)            | 1 | 1 | 1 | 1 | 1 | 1 | 1 | 0 | 0 | 0 | 3 |
| Number of aquatic environmental reservoirs                                        | 1 | 1 | 1 | 1 | 1 | 1 | 1 | 0 | 0 | 0 | 3 |
| Policies supporting biodiversity conservation                                     | 1 | 1 | 1 | 1 | 1 | 1 | 0 | 0 | 0 | 0 | 2 |
| Percentage of government expenditure on environmental protection                  | 1 | 1 | 1 | 1 | 1 | 1 | 0 | 0 | 0 | 0 | 2 |
| Percentage of area covered by Wetlands of International Importance (Ramsar Sites) | 1 | 1 | 1 | 1 | 1 | 1 | 0 | 0 | 0 | 0 | 2 |
| Participation in treaties, such as Convention on Biological Diversity             | 1 | 1 | 1 | 1 | 1 | 1 | 0 | 0 | 0 | 0 | 2 |
| Percentage of nature reserves and wetlands                                        | 1 | 1 | 1 | 1 | 1 | 1 | 0 | 0 | 0 | 0 | 2 |

|        |                                                                                         |   |   |   |   |   |   |   |   |   |   |   |
|--------|-----------------------------------------------------------------------------------------|---|---|---|---|---|---|---|---|---|---|---|
|        | Percentage of forest area restored                                                      | 1 | 1 | 1 | 1 | 1 | 1 | 0 | 0 | 0 | 0 | 2 |
|        | Rate of afforestation area                                                              | 1 | 1 | 1 | 1 | 1 | 1 | 0 | 0 | 0 | 0 | 2 |
|        | Proportion of drought tolerant crops                                                    | 1 | 1 | 1 | 1 | 1 | 1 | 1 | 0 | 0 | 0 | 3 |
|        | Percent of area with intensive/extensive agriculture                                    | 0 | 1 | 1 | 1 | 1 | 1 | 1 | 0 | 0 | 0 | 3 |
|        | Time needed for the natural vegetation to return to a certain percentage of plant cover | 0 | 1 | 1 | 1 | 1 | 1 | 0 | 0 | 0 | 0 | 2 |
|        | Restoration period of the natural vegetation after a disturbance                        | 1 | 1 | 1 | 1 | 1 | 1 | 0 | 0 | 0 | 0 | 2 |
|        | Average of monthly precipitation                                                        | 1 | 1 | 1 | 1 | 1 | 1 | 0 | 0 | 0 | 0 | 2 |
|        | Water level                                                                             | 1 | 1 | 1 | 1 | 1 | 1 | 0 | 0 | 0 | 0 | 2 |
|        | Hazard duration                                                                         | 1 | 1 | 1 | 1 | 1 | 1 | 0 | 0 | 0 | 0 | 2 |
|        | Probability of occurrence                                                               | 1 | 1 | 1 | 1 | 1 | 1 | 0 | 0 | 0 | 0 | 2 |
|        | Ecosystem exposed to storm                                                              | 1 | 1 | 1 | 1 | 1 | 1 | 0 | 0 | 0 | 0 | 2 |
|        | Ecosystem exposed to drought                                                            | 1 | 1 | 1 | 1 | 1 | 1 | 0 | 0 | 0 | 0 | 2 |
| Social | Aggregated index generated through recreation and tourism statistics                    | 1 | 1 | 1 | 1 | 0 | 0 | 1 | 1 | 1 | 0 | 3 |
|        | Experience: participation in recreational activities                                    | 1 | 1 | 1 | 1 | 0 | 0 | 1 | 1 | 1 | 0 | 3 |
|        | Share of high-provision, easily accessible land in the recreation opportunity spectrum  | 1 | 1 | 1 | 1 | 0 | 0 | 1 | 1 | 1 | 0 | 3 |
|        | Surface area of special protection area                                                 | 1 | 1 | 1 | 1 | 1 | 1 | 0 | 1 | 1 | 0 | 4 |
|        | Surface area of sites of community importance                                           | 1 | 1 | 1 | 1 | 1 | 1 | 0 | 1 | 1 | 0 | 4 |
|        | Employment (n); tourism revenue                                                         | 1 | 1 | 1 | 1 | 0 | 0 | 1 | 1 | 1 | 0 | 3 |
|        | Employment in tourism and other aesthetic activities                                    | 1 | 1 | 1 | 1 | 0 | 0 | 1 | 1 | 1 | 0 | 3 |
|        | Characteristics of living systems that are resonant in terms of culture or heritage     | 1 | 1 | 1 | 1 | 0 | 0 | 1 | 1 | 1 | 0 | 3 |

|                                                                                                                                                                                                       |   |   |   |   |   |   |   |   |   |   |   |
|-------------------------------------------------------------------------------------------------------------------------------------------------------------------------------------------------------|---|---|---|---|---|---|---|---|---|---|---|
| Percentage of population exposed to flooding                                                                                                                                                          | 1 | 1 | 1 | 1 | 1 | 1 | 1 | 1 | 1 | 0 | 5 |
| Proportion of GDP in primary sector                                                                                                                                                                   | 0 | 1 | 1 | 1 | 0 | 0 | 1 | 1 | 1 | 0 | 3 |
| Livestock net income                                                                                                                                                                                  | 1 | 1 | 1 | 1 | 0 | 1 | 1 | 1 | 1 | 0 | 4 |
| Livestock annual net income/basic annual family expenses                                                                                                                                              | 1 | 1 | 1 | 1 | 0 | 1 | 1 | 1 | 1 | 0 | 4 |
| List of livestock assets and income owned or/and managed by women                                                                                                                                     | 1 | 1 | 1 | 1 | 0 | 1 | 1 | 1 | 1 | 0 | 4 |
| Crop income compared to total annual family income                                                                                                                                                    | 1 | 1 | 1 | 1 | 0 | 1 | 1 | 1 | 1 | 0 | 4 |
| Out-of-farm income compared to total annual family income                                                                                                                                             | 1 | 1 | 1 | 1 | 0 | 0 | 1 | 1 | 1 | 0 | 3 |
| Proportion of houses with poor facilities that are more fragile to climate change and hazards                                                                                                         | 1 | 1 | 1 | 1 | 0 | 0 | 1 | 1 | 1 | 1 | 4 |
| Number of conflicts on land                                                                                                                                                                           | 1 | 1 | 1 | 1 | 0 | 0 | 0 | 1 | 1 | 0 | 2 |
| Carrying capacity on rangelands                                                                                                                                                                       | 1 | 1 | 1 | 1 | 0 | 1 | 1 | 1 | 1 | 0 | 4 |
| Proportion of critical transportation sector                                                                                                                                                          |   |   |   |   |   |   |   |   |   |   |   |
| Proportion of critical transportation sector: main road, main tunnel, subway, port, airport; water sector; energy sector; information and communication sector; civil administration buildings sector | 1 | 1 | 1 | 1 | 0 | 0 | 1 | 1 | 0 | 1 | 3 |
| Percentage of population exposed to drought                                                                                                                                                           | 1 | 1 | 1 | 1 | 1 | 1 | 0 | 1 | 1 | 0 | 4 |
| Distance to market for animal transaction                                                                                                                                                             | 0 | 1 | 1 | 1 | 0 | 1 | 1 | 0 | 0 | 1 | 3 |
| Pastoral institutions and organizations                                                                                                                                                               | 1 | 1 | 1 | 1 | 0 | 0 | 0 | 1 | 1 | 0 | 2 |
| Remittance from migrants                                                                                                                                                                              | 1 | 1 | 1 | 1 | 0 | 0 | 1 | 1 | 1 | 0 | 3 |
| Emigration rate                                                                                                                                                                                       | 1 | 1 | 1 | 1 | 0 | 0 | 1 | 1 | 1 | 0 | 3 |
| Percentage of population without access to electricity                                                                                                                                                | 1 | 1 | 1 | 1 | 0 | 0 | 1 | 1 | 1 | 1 | 4 |

|                                                                                                            |   |   |   |   |   |   |   |   |   |   |   |
|------------------------------------------------------------------------------------------------------------|---|---|---|---|---|---|---|---|---|---|---|
| Percentage of households without access to irrigation                                                      | 0 | 1 | 1 | 1 | 0 | 0 | 1 | 1 | 1 | 0 | 3 |
| Percentage of population without access to (improved) sanitation                                           | 1 | 1 | 1 | 1 | 0 | 0 | 1 | 1 | 1 | 0 | 3 |
| Percentage of population without access to clean water                                                     | 1 | 1 | 1 | 1 | 0 | 0 | 1 | 1 | 1 | 0 | 3 |
| Percentage of population living in informal settlements                                                    | 1 | 1 | 1 | 1 | 1 | 0 | 1 | 1 | 1 | 1 | 5 |
| Percentage of households that live in rented houses                                                        | 1 | 1 | 1 | 1 | 1 | 0 | 1 | 1 | 1 | 0 | 4 |
| The household proportion with person aged 65 and older                                                     | 1 | 1 | 1 | 1 | 1 | 1 | 1 | 1 | 1 | 1 | 6 |
| Percentage of reinforced/elevated houses                                                                   | 1 | 1 | 1 | 1 | 1 | 1 | 1 | 1 | 1 | 0 | 5 |
| Percentage of households without official land title                                                       | 1 | 1 | 1 | 1 | 0 | 1 | 0 | 1 | 1 | 1 | 4 |
| Percentage of houses with more than one floor                                                              | 1 | 1 | 1 | 1 | 0 | 1 | 0 | 1 | 1 | 1 | 4 |
| Credit access for livestock activity                                                                       | 0 | 1 | 1 | 1 | 0 | 1 | 1 | 1 | 0 | 1 | 4 |
| Fodder seed supply                                                                                         | 0 | 1 | 1 | 1 | 0 | 1 | 1 | 0 | 0 | 0 | 2 |
| Proportion of vaccinated animals                                                                           | 1 | 1 | 1 | 1 | 0 | 1 | 1 | 0 | 1 | 0 | 3 |
| Animal value stock (animal asset valued at selling price) per family member (compared to the poverty line) | 1 | 1 | 1 | 1 | 0 | 1 | 1 | 0 | 0 | 0 | 2 |
| Percentage of population living in poorly constructed houses                                               | 1 | 1 | 1 | 1 | 0 | 1 | 0 | 1 | 1 | 1 | 4 |
| Percentage of illiterate population                                                                        | 1 | 1 | 1 | 1 | 0 | 0 | 0 | 1 | 1 | 1 | 3 |
| Percentage of primary industry to GDP                                                                      | 1 | 1 | 1 | 1 | 0 | 1 | 1 | 1 | 1 | 1 | 5 |
| Population density                                                                                         | 1 | 1 | 1 | 1 | 1 | 1 | 1 | 1 | 1 | 1 | 6 |
| Percentage of female-headed households                                                                     | 1 | 1 | 1 | 1 | 0 | 1 | 1 | 1 | 1 | 1 | 5 |
| Travel time to closest city                                                                                | 1 | 1 | 1 | 1 | 0 | 1 | 1 | 1 | 1 | 1 | 5 |
| Percentage of the population with disabilities                                                             | 1 | 1 | 1 | 1 | 0 | 1 | 1 | 1 | 1 | 1 | 5 |



|                                                                       |   |   |   |   |   |   |   |   |   |   |   |
|-----------------------------------------------------------------------|---|---|---|---|---|---|---|---|---|---|---|
| Percentage malnourished population                                    | 1 | 1 | 1 | 1 | 0 | 1 | 1 | 1 | 1 | 0 | 4 |
| Percentage of population with chronic illnesses                       | 1 | 1 | 1 | 1 | 0 | 1 | 1 | 1 | 1 | 0 | 4 |
| Proportion of families below poverty line in total households         | 1 | 1 | 1 | 1 | 0 | 1 | 1 | 1 | 1 | 0 | 4 |
| Dependency ratio                                                      | 1 | 1 | 1 | 1 | 0 | 1 | 1 | 1 | 1 | 0 | 4 |
| GINI index                                                            | 1 | 1 | 1 | 1 | 0 | 1 | 1 | 1 | 1 | 0 | 4 |
| Dependency on agriculture /forestry for livelihood                    | 0 | 1 | 1 | 1 | 0 | 1 | 1 | 1 | 1 | 0 | 4 |
| Ratio of afforestation coverage areas in the city                     | 1 | 1 | 1 | 1 | 1 | 1 | 0 | 0 | 0 | 1 | 3 |
| Prevalence of population who experience violence                      | 1 | 1 | 1 | 1 | 0 | 0 | 0 | 1 | 1 | 0 | 2 |
| Prevalence of population affected by armed conflict                   | 1 | 1 | 1 | 1 | 0 | 0 | 0 | 1 | 1 | 0 | 2 |
| Number of fatalities caused by terrorists per 10,000 per year         | 1 | 1 | 1 | 1 | 0 | 0 | 0 | 1 | 1 | 0 | 2 |
| Per capita income                                                     | 1 | 1 | 1 | 1 | 0 | 0 | 1 | 1 | 1 | 1 | 4 |
| Per capita GDP per unit area                                          | 1 | 1 | 1 | 1 | 0 | 0 | 1 | 1 | 1 | 1 | 4 |
| Average years of education                                            | 1 | 1 | 1 | 1 | 0 | 1 | 1 | 1 | 1 | 1 | 5 |
| Ratio of the population with college/university degree or higher      | 1 | 1 | 1 | 1 | 0 | 1 | 1 | 1 | 1 | 1 | 5 |
| Percentage of households without individual means of transportation   | 1 | 1 | 1 | 1 | 0 | 1 | 0 | 1 | 1 | 1 | 4 |
| Percentage of households without gross savings                        | 1 | 1 | 1 | 1 | 0 | 0 | 0 | 1 | 1 | 1 | 3 |
| Percentage of households without access to bank loans/(micro-)credits | 1 | 1 | 1 | 1 | 0 | 0 | 0 | 1 | 1 | 1 | 3 |
| Percentage of households without any insurance—excl. health insurance | 1 | 1 | 1 | 1 | 0 | 0 | 0 | 1 | 1 | 1 | 3 |
| Animal stock per veterinarian in the community                        | 0 | 1 | 1 | 1 | 0 | 1 | 1 | 0 | 1 | 0 | 3 |

|                                                                                     |   |   |   |   |   |   |   |   |   |   |   |
|-------------------------------------------------------------------------------------|---|---|---|---|---|---|---|---|---|---|---|
| Distance of veterinary services from family house                                   | 0 | 1 | 1 | 1 | 0 | 1 | 1 | 0 | 1 | 1 | 4 |
| Distance of veterinary service from rangeland in the territory of attachment        | 0 | 1 | 1 | 1 | 0 | 1 | 1 | 0 | 1 | 1 | 4 |
| Distance of veterinary pharmacy from family house                                   | 0 | 1 | 1 | 1 | 0 | 1 | 1 | 0 | 1 | 1 | 4 |
| The average cost of veterinary medicine                                             | 0 | 1 | 1 | 1 | 0 | 1 | 1 | 0 | 1 | 1 | 4 |
| Percentage of population without a health insurance                                 | 1 | 1 | 1 | 1 | 0 | 0 | 1 | 1 | 1 | 0 | 3 |
| Net income per person in working age (compared to the minimum wage)                 | 1 | 1 | 1 | 1 | 0 | 0 | 1 | 1 | 1 | 0 | 3 |
| Density of strong ties within the local social network                              | 1 | 1 | 1 | 1 | 0 | 0 | 1 | 1 | 1 | 0 | 3 |
| Density of links within the extended networks (administration, traders, etc.)       | 1 | 1 | 1 | 1 | 0 | 0 | 1 | 1 | 1 | 0 | 3 |
| Equipment: telephone, internet, road, electricity, etc.                             | 1 | 1 | 1 | 1 | 0 | 1 | 1 | 1 | 1 | 0 | 4 |
| Proximity                                                                           | 1 | 1 | 1 | 1 | 0 | 0 | 0 | 0 | 1 | 1 | 2 |
| Number of visits/year                                                               | 1 | 1 | 1 | 1 | 0 | 0 | 0 | 1 | 1 | 0 | 2 |
| Elasticity of animal product demand                                                 | 0 | 1 | 1 | 1 | 0 | 1 | 1 | 0 | 0 | 0 | 2 |
| Animal supply dynamic                                                               | 0 | 1 | 1 | 1 | 0 | 1 | 1 | 0 | 0 | 0 | 2 |
| Household size                                                                      | 1 | 1 | 1 | 1 | 1 | 1 | 0 | 1 | 1 | 1 | 5 |
| Working-age persons in the household                                                | 1 | 1 | 1 | 1 | 1 | 1 | 0 | 1 | 1 | 1 | 5 |
| Household dependency ratio                                                          | 1 | 1 | 1 | 1 | 1 | 1 | 0 | 1 | 1 | 1 | 5 |
| Number of people with higher education                                              | 1 | 1 | 1 | 1 | 1 | 1 | 0 | 1 | 1 | 1 | 5 |
| Value of animal stock (valued at the selling price) per children (transmissibility) | 1 | 1 | 1 | 1 | 0 | 1 | 1 | 1 | 0 | 1 | 4 |
| Existence of early warning systems                                                  | 1 | 1 | 1 | 1 | 1 | 1 | 1 | 0 | 0 | 1 | 4 |
| Volume of water storage in a safe reservoir/container                               | 1 | 1 | 1 | 1 | 1 | 1 | 1 | 0 | 0 | 0 | 3 |

|                                                                                                                                                                                     |   |   |   |   |   |   |   |   |   |   |   |
|-------------------------------------------------------------------------------------------------------------------------------------------------------------------------------------|---|---|---|---|---|---|---|---|---|---|---|
| Number of hospital beds per 1000 inhabitants                                                                                                                                        | 1 | 1 | 1 | 1 | 1 | 1 | 0 | 1 | 1 | 1 | 5 |
| Access to shelter places (density of schools)                                                                                                                                       | 1 | 1 | 1 | 1 | 1 | 1 | 0 | 1 | 1 | 1 | 5 |
| Percentage of households without access to waste/water treatment                                                                                                                    | 1 | 1 | 1 | 1 | 1 | 1 | 0 | 1 | 1 | 1 | 5 |
| Drainage system: average length of drainage network                                                                                                                                 | 1 | 1 | 1 | 1 | 1 | 1 | 0 | 1 | 1 | 1 | 5 |
| Access to emergency places (density of hospitals, fire bridges, police stations)                                                                                                    | 1 | 1 | 1 | 1 | 1 | 1 | 0 | 1 | 1 | 1 | 5 |
| Density of transportation network: combined measure of distance to nearest station, density of road and rail networks, density of bus stations and ports for transportation service | 1 | 1 | 1 | 1 | 1 | 1 | 0 | 1 | 1 | 1 | 5 |
| Public health expenditure                                                                                                                                                           | 1 | 1 | 1 | 1 | 0 | 0 | 0 | 0 | 1 | 1 | 2 |
| Private health expenditure                                                                                                                                                          | 1 | 1 | 1 | 1 | 0 | 0 | 0 | 0 | 1 | 1 | 2 |
| Density of aid projects                                                                                                                                                             | 1 | 1 | 1 | 1 | 0 | 0 | 1 | 1 | 1 | 1 | 4 |
| Percentage of population who has experienced hazard(s) in the past 10 years                                                                                                         | 1 | 1 | 1 | 1 | 0 | 0 | 1 | 1 | 1 | 1 | 4 |
| Foreign direct investment                                                                                                                                                           | 1 | 1 | 1 | 1 | 0 | 0 | 1 | 1 | 1 | 1 | 4 |
| Percentage of farmers who use different crop varieties                                                                                                                              | 0 | 1 | 1 | 1 | 1 | 1 | 1 | 1 | 0 | 0 | 4 |
| Number of income-generating activities per household                                                                                                                                | 1 | 1 | 1 | 1 | 0 | 0 | 1 | 1 | 1 | 1 | 4 |
| Existence of hazard/vulnerability/risk map                                                                                                                                          | 1 | 1 | 1 | 1 | 1 | 0 | 0 | 1 | 1 | 1 | 4 |
| Existence of integrated development plans: conservation, protection, land use planning                                                                                              | 1 | 1 | 1 | 1 | 1 | 0 | 0 | 1 | 1 | 1 | 4 |
| Existence of adaptation policies/strategies                                                                                                                                         | 1 | 1 | 1 | 1 | 1 | 0 | 0 | 1 | 1 | 1 | 4 |

|                                                                   |   |   |   |   |   |   |   |   |   |   |   |
|-------------------------------------------------------------------|---|---|---|---|---|---|---|---|---|---|---|
| Percentage of GDP spent on innovation and research                | 1 | 1 | 1 | 1 | 0 | 1 | 1 | 1 | 1 | 0 | 4 |
| Amount of subsidies par animal at the territorial level           | 0 | 1 | 1 | 1 | 0 | 1 | 1 | 1 | 0 | 0 | 3 |
| Percentage of reproductive females in the herd per animal species | 1 | 1 | 1 | 1 | 0 | 1 | 1 | 1 | 0 | 0 | 3 |

Climate change (CC); resources optimization (Rop); local businesses (LB); gender approach (GA); urban health (UH); sustainable mobility (SM).

**Table S3.** Expert weighting of indicators.

| Component  | General indicators                                           | Average weight of experts | Category    | Yes (1)/No (0) |
|------------|--------------------------------------------------------------|---------------------------|-------------|----------------|
| Ecological | Volumes of harvested production                              | 3                         | N.A         | N.A            |
|            | Harvested production of energy                               | 1                         | N.A         | N.A            |
|            | Total groundwater recharge                                   | 4                         | Environment | 0              |
|            | Groundwater quality                                          | 4                         | Environment | 1              |
|            | Proportion of renewable water withdrawn for public use       | 1                         | N.A         | N.A            |
|            | Use of raw water                                             | 3                         | N.A         | N.A            |
|            | Total water abstraction for public use                       | 3                         | N.A         | N.A            |
|            | Total water abstraction for industrial use                   | 3                         | N.A         | N.A            |
|            | Proportion of renewable water withdrawn for industrial use   | 0                         | N.A         | N.A            |
|            | Total water abstraction for agricultural use                 | 3                         | N.A         | N.A            |
|            | Proportion of renewable water withdrawn for agricultural use | 0                         | N.A         | N.A            |
|            | Quality of water on rangelands                               | 4                         | Environment | 0              |
|            | Expenses for water access on rangelands                      | 1                         | N.A         | N.A            |
|            | Primary production                                           | 2                         | N.A         | N.A            |
|            | Surface area of crops                                        | 3                         | N.A         | N.A            |
|            | Months of feedstock over the duration of the season          | 0                         | N.A         | N.A            |
|            | Counts of animal per species received from or given to       | 3                         | N.A         | N.A            |
|            | Milk production                                              | 3                         | N.A         | N.A            |

|                                                                                 |   |             |     |
|---------------------------------------------------------------------------------|---|-------------|-----|
| Wood production                                                                 | 3 | N.A         | N.A |
| Other animal services (animal traction, transportation, touristic riding, etc.) | 3 | N.A         | N.A |
| Cash flow from animal products during the season                                | 3 | N.A         | N.A |
| Animal seasonal cash flow compared to family food and health expenses.          | 4 | Social      | 1   |
| Genetic improvement                                                             | 1 | N.A         | N.A |
| Available selection pressure                                                    | 1 | N.A         | N.A |
| Proportion of fodder crop area in the cultivated area                           | 3 | N.A         | N.A |
| Manure production                                                               | 2 | N.A         | N.A |
| Proportion of cropping encroachment                                             | 1 | N.A         | N.A |
| Animal products                                                                 | 2 | N.A         | N.A |
| Distance                                                                        | 4 | Territory   | 1   |
| Seasonal fees to access pastureland                                             | 1 | N.A         | N.A |
| Supplementation during the mobility                                             | 1 | N.A         | N.A |
| Access to water supply on rangelands                                            | 2 | N.A         | N.A |
| Biomass production                                                              | 2 | N.A         | N.A |
| Pasture quality                                                                 | 3 | N.A         | N.A |
| Species richness and diversity                                                  | 4 | Environment | 1   |
| Soil nutrients                                                                  | 3 | N.A         | N.A |
| Dry matter availability from pastoral and crop areas                            | 2 | N.A         | N.A |
| Dry matter requirement of the community herd                                    | 1 | N.A         | N.A |
| Length of growing period per plant species                                      | 0 | N.A         | N.A |
| Soil and water quality and availability                                         | 4 | Environment | 1   |
| Improved water and soil quality                                                 | 2 | N.A         | N.A |
| Total timber removal                                                            | 3 | N.A         | N.A |
| Timber growing stock                                                            | 4 | Social      | 0   |
| Aggregated index of nutrient recycling potential as function of substrate type  | 0 | N.A         | N.A |
| Nitrogen fixation rate                                                          | 0 | N.A         | N.A |
| Soil retention                                                                  | 3 | N.A         | N.A |
| Increased harvest                                                               | 1 | N.A         | N.A |
| Gross nitrogen balance                                                          | 1 | N.A         | N.A |

|                                                                                                     |   |             |     |
|-----------------------------------------------------------------------------------------------------|---|-------------|-----|
| Pollination potential                                                                               | 2 | N.A         | N.A |
| Increase in yield                                                                                   | 0 | N.A         | N.A |
| Biodiversity Intactness Index                                                                       | 4 | Environment | 0   |
| Percentage of protected area                                                                        | 4 | Territory   | 1   |
| Removal of NO <sub>2</sub> by urban vegetation                                                      | 3 | N.A         | N.A |
| Proportion of green areas in the high-density area of cities                                        | 2 | N.A         | N.A |
| PM <sub>10</sub> annual mean concentration                                                          | 2 | N.A         | N.A |
| NO <sub>2</sub> annual mean concentration                                                           | 2 | N.A         | N.A |
| The highest O <sub>3</sub> value based on daily max 8 h averages                                    | 2 | N.A         | N.A |
| Water quality                                                                                       | 2 | N.A         | N.A |
| Water Retention Index                                                                               | 2 | N.A         | N.A |
| Water purification                                                                                  | 2 | N.A         | N.A |
| Groundwater production                                                                              | 2 | N.A         | N.A |
| Rates of surface water drainage                                                                     | 3 | N.A         | N.A |
| Capacity of ecosystems to avoid soil erosion                                                        | 3 | N.A         | N.A |
| Surface area of forest with a protective function                                                   | 3 | N.A         | N.A |
| Crop production deficit                                                                             | 1 | N.A         | N.A |
| Habitat quality based on common birds                                                               | 1 | N.A         | N.A |
| Interpolated biodiversity status                                                                    | 3 | N.A         | N.A |
| Net ecosystem productivity                                                                          | 1 | N.A         | N.A |
| Forest carbon potential                                                                             | 3 | N.A         | N.A |
| Annual CO <sub>2</sub> -eq emissions per ha                                                         | 2 | N.A         | N.A |
| Annual CO <sub>2</sub> -eq emissions per capita                                                     | 2 | N.A         | N.A |
| Carbon-storing habitats                                                                             | 2 | N.A         | N.A |
| Overall coverage of forest                                                                          | 3 | N.A         | N.A |
| Potential increase in agricultural production to compensate the reduction due to the climate change | 2 | N.A         | N.A |
| Standard deviation of annual rainfall                                                               | 4 | Environment | 1   |
| Biodiversity of landscapes                                                                          | 4 | Environment | 1   |
| Magnitude of change of the natural biomass after a disturbance                                      | 1 | N.A         | N.A |
| Percentage of windbreaks                                                                            | 0 | N.A         | N.A |
| Aggregated index generated through recreation and tourism statistics                                | 3 | N.A         | N.A |

|                                                                                                          |   |                          |     |
|----------------------------------------------------------------------------------------------------------|---|--------------------------|-----|
| Percentage of tourism to GDP                                                                             | 4 | Social                   | 0   |
| Intensity of natural and cultural heritage protection based on the number of protected areas overlapping | 3 | N.A                      | N.A |
| Ecosystem exposed to flooding                                                                            | 4 | Territory                | 1   |
| Seasonal rainfall                                                                                        | 3 | N.A                      | N.A |
| Counts of animals per species                                                                            | 2 | N.A                      | N.A |
| Area of fodder and grain crops for animals/total cultivated land                                         | 2 | N.A                      | N.A |
| Animal protein intake in the daily ration                                                                | 2 | N.A                      | N.A |
| Species composition (intra-herd diversity)                                                               | 1 | N.A                      | N.A |
| Percentage of vegetation loss                                                                            | 4 | Territory                | 1   |
| Percentage of deforested area                                                                            | 4 | Territory                | 1   |
| Percentage of area covered by "problem soils"                                                            | 4 | Territory<br>Social      | 1   |
| Increased use of chemicals and fertilizers                                                               | 4 | Environment<br>Social    | 1   |
| Water clarity                                                                                            | 1 | N.A                      | N.A |
| Normalized Difference Vegetation Index                                                                   | 3 | N.A                      | N.A |
| Land reclamation rate                                                                                    | 2 | N.A                      | N.A |
| Degree of pollution in sediments                                                                         | 2 | N.A                      | N.A |
| Forest connectivity                                                                                      | 4 | Territory                | 1   |
| River connectivity                                                                                       | 4 | Territory                | 1   |
| River net density (defined as river length divided by land area)                                         | 2 | N.A                      | N.A |
| Ecosystem Functionality Index (EFI)                                                                      | 1 | N.A                      | N.A |
| Mean species abundance                                                                                   | 3 | N.A                      | N.A |
| Percentage of change in land use (agriculture, vegetation, settlement)                                   | 4 | Territory                | 1   |
| Number of aquatic environmental reservoirs                                                               | 3 | N.A                      | N.A |
| Policies supporting biodiversity conservation                                                            | 4 | Territory<br>Environment | 0   |
| Percentage of government expenditure on environmental protection                                         | 3 | N.A                      | N.A |
| Percentage of area covered by Wetlands of International Importance (Ramsar Sites)                        | 3 | N.A                      | N.A |
| Participation in treaties, such as Convention on Biological Diversity                                    | 2 | N.A                      | N.A |
| Percentage of nature reserves and wetlands                                                               | 3 | N.A                      | N.A |

|        |                                                                                         |   |           |     |
|--------|-----------------------------------------------------------------------------------------|---|-----------|-----|
| Social | Percentage of forest area restored                                                      | 4 | Territory | 1   |
|        | Rate of afforestation area                                                              | 4 | Territory | 1   |
|        | Proportion of drought tolerant crops                                                    | 3 | N.A       | N.A |
|        | Percent of area with intensive/extensive agriculture                                    | 3 | N.A       | N.A |
|        | Time needed for the natural vegetation to return to a certain percentage of plant cover | 3 | N.A       | N.A |
|        | Restoration period of the natural vegetation after a disturbance                        | 2 | N.A       | N.A |
|        | Average of monthly precipitation                                                        | 3 | N.A       | N.A |
|        | Water level                                                                             | 3 | N.A       | N.A |
|        | Hazard duration                                                                         | 3 | N.A       | N.A |
|        | Probability of occurrence                                                               | 2 | N.A       | N.A |
|        | Ecosystem exposed to storm                                                              | 4 | Social    | 0   |
|        | Ecosystem exposed to drought                                                            | 4 | Territory | 1   |
|        | Aggregated index generated through recreation and tourism statistics                    | 3 | N.A       | N.A |
|        | Experience: participation in recreational activities                                    | 3 | N.A       | N.A |
|        | Share of high-provision, easily accessible land in the recreation opportunity spectrum  | 0 | N.A       | N.A |
|        | Surface area of special protection area                                                 | 2 | N.A       | N.A |
|        | Surface area of sites of community importance                                           | 4 | Social    | 1   |
|        | Employment (n); tourism revenue                                                         | 4 | Territory | 1   |
|        | Employment in tourism and other aesthetic activities                                    | 4 | Territory | 1   |
|        | Characteristics of living systems that are resonant in terms of culture or heritage     | 3 | N.A       | N.A |
|        | Percentage of population exposed to flooding                                            | 2 | N.A       | N.A |
|        | Proportion of GDP in primary sector                                                     | 2 | N.A       | N.A |
|        | Livestock net income                                                                    | 2 | N.A       | N.A |
|        | Livestock annual net income/basic annual family expenses                                | 2 | N.A       | N.A |
|        | List of livestock assets and income owned or/and managed by women                       | 2 | N.A       | N.A |
|        | Crop income compared to total annual family income                                      | 2 | N.A       | N.A |
|        | Out-of-farm income compared to total annual family income                               | 2 | N.A       | N.A |



|                                                                                                                                                                                                       |   |                       |     |
|-------------------------------------------------------------------------------------------------------------------------------------------------------------------------------------------------------|---|-----------------------|-----|
| Proportion of houses with poor facilities that are more fragile to climate change and hazards                                                                                                         | 4 | Territory Environment | 0   |
| Number of conflicts on land                                                                                                                                                                           | 3 | N.A                   | N.A |
| Carrying capacity on rangelands                                                                                                                                                                       | 3 | N.A                   | N.A |
| Proportion of critical transportation sector                                                                                                                                                          |   |                       |     |
| Proportion of critical transportation sector: main road, main tunnel, subway, port, airport; water sector; energy sector; information and communication sector; civil administration buildings sector | 2 | N.A                   | N.A |
| Proportion of houses with poor facilities that are more fragile to climate change and hazards                                                                                                         | 4 | Territory             | 1   |
| Percentage of population exposed to drought or flooding                                                                                                                                               | 4 | Territory             | 1   |
| Distance to market for animal transaction                                                                                                                                                             | 1 | N.A                   | N.A |
| Pastoral institutions and organizations                                                                                                                                                               | 3 | N.A                   | N.A |
| Remittance from migrants                                                                                                                                                                              | 2 | N.A                   | N.A |
| Emigration rate                                                                                                                                                                                       | 4 | Social                | 1   |
| Percentage of population without access to electricity                                                                                                                                                | 4 | Territory             | 1   |
| Percentage of households without access to irrigation                                                                                                                                                 | 4 | Territory             | 1   |
| Percentage of population without access to (improved) sanitation                                                                                                                                      | 4 | Territory             | 0   |
| Percentage of population without access to clean water                                                                                                                                                | 4 | Territory Social      | 1   |
| Percentage of population living in informal settlements                                                                                                                                               | 4 | Territory             | 1   |
| Percentage of households that live in rented houses                                                                                                                                                   | 2 | N.A                   | N.A |
| The household proportion with person aged 65 and older                                                                                                                                                | 4 | Social                | 1   |
| Percentage of reinforced/elevated houses                                                                                                                                                              | 2 | N.A                   | N.A |
| Percentage of households without official land title                                                                                                                                                  | 4 | Social                | 1   |
| Percentage of houses with more than one floor                                                                                                                                                         | 1 | N.A                   | N.A |
| Credit access for livestock activity                                                                                                                                                                  | 2 | N.A                   | N.A |
| Fodder seed supply                                                                                                                                                                                    | 1 | N.A                   | N.A |
| Proportion of vaccinated animals                                                                                                                                                                      | 1 | N.A                   | N.A |
| Animal value stock (animal asset valued at selling price) per family member (compared to the poverty line)                                                                                            | 1 | N.A                   | N.A |
| Percentage of population living in poorly constructed houses                                                                                                                                          | 4 | Territory             | 1   |

|                                                                              |   |           |     |
|------------------------------------------------------------------------------|---|-----------|-----|
| Percentage of illiterate population                                          | 4 | Territory | 1   |
| Percentage of primary industry to GDP                                        | 4 | Social    | 1   |
| Population density                                                           | 4 | Social    | 0   |
| Percentage of female-headed households                                       | 4 | Social    | 1   |
| Travel time to closest city                                                  | 4 | Territory | 0   |
| Percentage of the population with disabilities                               | 4 | Social    | 1   |
| Percentage malnourished population                                           | 4 | Social    | 1   |
| Percentage of population with chronic illnesses                              | 4 | Social    | 0   |
| Proportion of families below poverty line in total households                | 4 | Social    | 1   |
| Dependency ratio                                                             | 3 | N.A       | N.A |
| GINI index                                                                   | 2 | N.A       | N.A |
| Dependency on agriculture/forestry for livelihood                            | 2 | N.A       | N.A |
| Ratio of afforestation coverage areas in the city                            | 1 | N.A       | N.A |
| Prevalence of population who experience violence                             | 3 | N.A       | N.A |
| Prevalence of population affected by armed conflict                          | 3 | N.A       | N.A |
| Number of fatalities caused by terrorists per 10,000 per year                | 1 | N.A       | N.A |
| Per capita income                                                            | 4 | Social    | 0   |
| Per capita GDP per unit area                                                 | 2 | N.A       | N.A |
| Average years of education                                                   | 4 | Social    | 0   |
| Ratio of the population with college/university degree or higher             | 4 | Social    | 0   |
| Percentage of households without individual means of transportation          | 4 | Territory | 1   |
| Percentage of households without gross savings                               | 4 | Social    | 1   |
| Percentage of households without access to bank loans/(micro-) credits       | 4 | Social    | 1   |
| Percentage of households without any insurance—excl. health insurance        | 4 | Social    | 1   |
| Animal stock per veterinarian in the community                               | 1 | N.A       | N.A |
| Distance of veterinary services from family house                            | 1 | N.A       | N.A |
| Distance of veterinary service from rangeland in the territory of attachment | 1 | N.A       | N.A |
| Distance of veterinary pharmacy from family house                            | 1 | N.A       | N.A |
| The average cost of veterinary medicine                                      | 1 | N.A       | N.A |

|                                                                                                                                                                                     |   |                     |     |
|-------------------------------------------------------------------------------------------------------------------------------------------------------------------------------------|---|---------------------|-----|
| Percentage of population without a health insurance                                                                                                                                 | 2 | N.A                 | N.A |
| Net income per person in working age (compared to the minimum wage)                                                                                                                 | 2 | N.A                 | N.A |
| Density of strong ties within the local social network                                                                                                                              | 4 | Social              | 0   |
| Density of links within the extended networks (administration, traders, etc.)                                                                                                       | 4 | Social              | 0   |
| Equipment: telephone, internet, road, electricity, etc.                                                                                                                             | 4 | Territory           | 1   |
| Proximity                                                                                                                                                                           | 3 | N.A                 | N.A |
| Number of visits/year                                                                                                                                                               | 3 | N.A                 | N.A |
| Elasticity of animal product demand                                                                                                                                                 | 1 | N.A                 | N.A |
| Animal supply dynamic                                                                                                                                                               | 1 | N.A                 | N.A |
| Household size                                                                                                                                                                      | 2 | N.A                 | N.A |
| Working-age persons in the household                                                                                                                                                | 4 | Social              | 0   |
| Household dependency ratio                                                                                                                                                          | 4 | Social              | 0   |
| Number of people with higher education                                                                                                                                              | 4 | Social              | 1   |
| Value of animal stock (valued at the selling price) per children (transmissibility)                                                                                                 | 0 | N.A                 | N.A |
| Existence of early warning systems                                                                                                                                                  | 3 | N.A                 | N.A |
| Volume of water storage in a safe reservoir/container                                                                                                                               | 4 | Territory           | 1   |
| Number of hospital beds per 1000 inhabitants                                                                                                                                        | 2 | N.A                 | N.A |
| Access to shelter places (density of schools)                                                                                                                                       | 3 | N.A                 | N.A |
| Percentage of households without access to waste/water treatment                                                                                                                    | 4 | Territory           | 1   |
| Drainage system: average length of drainage network                                                                                                                                 | 4 | Territory           | 0   |
| Access to emergency places (density of hospitals, fire bridges, police stations)                                                                                                    | 4 | Territory<br>Social | 1   |
| Density of transportation network: combined measure of distance to nearest station, density of road and rail networks, density of bus stations and ports for transportation service | 4 | Territory<br>Social | 1   |
| Public health expenditure                                                                                                                                                           | 3 | N.A                 | N.A |
| Private health expenditure                                                                                                                                                          | 3 | N.A                 | N.A |
| Density of aid projects                                                                                                                                                             | 3 | N.A                 | N.A |
| Percentage of population who has experienced hazard(s) in the past 10 years                                                                                                         | 4 | Social              | 1   |

|                                                                                           |   |           |     |
|-------------------------------------------------------------------------------------------|---|-----------|-----|
| Foreign direct investment                                                                 | 2 | N.A       | N.A |
| Percentage of farmers who use different crop varieties                                    | 2 | N.A       | N.A |
| Number of income-generating activities per household                                      | 4 | Social    | 1   |
| Existence of hazard/vulnerability/risk map                                                | 4 | Territory | 0   |
| Existence of integrated development plans: conservation, protection,<br>land use planning | 4 | Territory | 0   |
| Existence of adaptation policies/strategies                                               | 4 | Territory | 1   |
| Percentage of GDP spent on innovation and research                                        | 3 | N.A       | N.A |
| Amount of subsidies par animal at the territorial level                                   | 0 | N.A       | N.A |
| Percentage of reproductive females in the herd per animal species                         | 0 | N.A       | N.A |
