# Supplementary material for: Multidisciplinary Evaluation of Vulnerabilities: Communities in Northern Mexico
Source: MDPI journal article supplement (doi:10.3390/su151713077), 2023-08-30
Supplement: s1 [file s1]

Archive with 2 entries (2 files):
- Table S1-S3.pdf
- Table S4. Analysis of data.xlsx
