# Supplementary material for: Multidisciplinary Evaluation of Vulnerabilities: Communities in Northern Mexico
Source: MDPI journal article supplement (doi:10.3390/su151713077), 2023-08-30
Supplement: s1 [file s1 › Table S4. Analysis of data.xlsx]

## Sheet: Weighting scale
	Weighting scale
Nothing important	0
Something important	1
Very important	2
Missing data	-

## Sheet: Cod indicators
Component	Indicator	Indicator Code
Ecological	Groundwater quality	I1
	Animal seasonal cash flow compared to family food and health expenses.	I2
	Proximity Index (Distance)	I3
	Species richness and diversity	I4
	Soil and water quality and availability	I5
	Percentage of protected area	I6
	Standard deviation of annual rainfall	I7
	Biodiversity of landscapes	I8
	Ecosystem exposed to flooding	I9
	Percentage of vegetation loss	I10
	Percentage of deforested area	I11
	Percentage of area covered by "problem soils"	I12
	Increased use of chemicals and fertilisers	I13
	Forest connectivity	I14
	River connectivity	I15
	Percentage of change in land use (agriculture, vegetation, settlement)	I16
	Percentage of forest area restored	I17
	Rate of afforestation area	I18
	Ecosystem exposed to drought	I19
Social	Surface area of sites of community importance	I20
	Employment (n); Tourism revenue Employment in tourism and other aesthetic activities	I21
	Proportion of houses with poor facilities that are more fragile to climate change and hazards	I22
	Percentage of population exposed to drought/flooding	I23
	Emigration rate	I24
	Percentage of population without access to electricity	I25
	Percentage of households without access to irrigation	I26
	Percentage of population without access to clean water	I27
	Percentage of population living in informal settlements	I28
	The household proportion with person aged 65 and older	I29
	Percentage of households without official land title	I30
	Percentage of population living in poorly-constructed houses	I31
	Percentage of illiterate population	I32
	Percentage of primary industry to GDP	I33
	Percentage female-headed households	I34
	Percentage of the population with disabilities	I35
	Percentage malnourished population	I36
	Proportion of families below poverty line in total households	I37
	Percentage of households without individual means of transportation	I38
	Percentage of households without gross savings	I39
	Percentage of households without access to bank loans / (micro-) credits	I40
	Percentage of households without any insurance - excl. health insurance	I41
	Equipements: telephone, internet, road, electricity, etc.	I42
	Number of people with higher education	I43
	Volume of water storage in a safe reservoir/container	I44
	Percentage of households without access to waste/water treatment	I45
	Access to emergency places (density of hospitals, fire bridges, police stations)	I46
	Density of transportation network: Combined measure of distance to nearest station, density of road and rail networks, density of bus stations and ports for transportation service	I47
	Percentage of population who has experienced hazard(s) in the past 10 years	I48
	Number of income-generating activities per household and woman	I49
	Existence of adaptation policies/strategies (consciousness)	I50

## Sheet: General Id
id	Gender	Age	Place		Context	Female	Masculine	N.D	Total
1	Female	59	La Regina		La Regina	10	2	0	12
2	Female	67	La Regina		Basaseachi	5	5	2	12
3	Female	26	La Regina		Nueva Delicias	8	3	0	11
4	Female	50	La Regina		Paso del Norte	8	0	0	8
5	Female	35	La Regina		Total	31	10	2	43
6	Female	43	La Regina
7	Masculine	49	La Regina			General	Female	Masculine
8	Masculine	31	La Regina		Mode	35
9	Female	49	La Regina		Mean	42.3415	43.0323	40.2
10	Female	30	La Regina		Median	39
11	Female	30	La Regina		Standard deviation	11.9428
12	Female	56	La Regina		Mean desviation	10.1225
13	Masculine	37	Basaseachi		Variance	142.63
14	Masculine	33	Basaseachi		Coefficient of variation	0.282059
15	N.D	N.D	Basaseachi		Maximum limit	54.2843
16	Masculine	38	Basaseachi		Minimum limit	28.8775
17	Female	34	Basaseachi
18	Masculine	54	Basaseachi
19	Female	43	Basaseachi
20	Female	40	Basaseachi
21	Female	44	Basaseachi
22	Masculine	36	Basaseachi
23	Female	36	Basaseachi
24	N.D	N.D	Basaseachi
25	Female	60	Nuevas Delicias
26	Female	37	Nuevas Delicias
27	Female	47	Nuevas Delicias
28	Masculine	50	Nuevas Delicias
29	Female	52	Nuevas Delicias
30	Female	29	Nuevas Delicias
31	Female	28	Nuevas Delicias
32	Female	35	Nuevas Delicias
33	Female	26	Nuevas Delicias
34	Masculine	35	Nuevas Delicias
35	Masculine	39	Nuevas Delicias
36	Female	23	Paso del Norte
37	Female	30	Paso del Norte
38	Female	72	Paso del Norte
39	Female	54	Paso del Norte
40	Female	56	Paso del Norte
41	Female	53	Paso del Norte
42	Female	54	Paso del Norte
43	Female	36	Paso del Norte

## Sheet: Values
id	Gender	Age	Place	I1	I2	I3	I4	I5	I6	I7	I8	I9	I10	I11	I12	I13	I14	I15	I16	I17	I18	I19	I20	I21	I22	I23	I24	I25	I26	I27	I28	I29	I30	I31	I32	I33	I34	I35	I36	I37	I38	I39	I40	I41	I42	I43	I44	I45	I46
1	Female	59	La Regina	2	1	1	2	2	2	2	2	2	2	2	2	2	2	2	1	2	2	2	1	0	-	1	2	0	1	2	1	2	1	1	1	2	1	2	0	1	2	1	0	0	0	1	1	0	2
2	Female	67	La Regina	-	1	1	2	2	2	2	2	2	2	2	2	2	2	2	1	1	2	2	1	1	-	2	2	0	2	2	0	2	-	2	1	0	2	2	1	2	2	2	2	0	0	2	1	2	2
3	Female	26	La Regina	2	1	1	1	2	2	2	2	2	2	0	1	1	2	2	2	2	2	2	1	2	2	2	0	0	2	2	1	2	2	2	2	2	1	2	2	2	1	0	0	0	0	1	2	2	2
4	Female	50	La Regina	-	1	1	1	2	2	2	1	2	1	1	1	2	-	2	0	-	1	2	1	1	2	2	1	0	1	2	0	2	0	0	1	1	2	1	1	0	1	2	0	0	1	2	2	2	1
5	Female	35	La Regina	2	2	2	1	2	2	2	1	2	1	2	2	2	2	2	2	2	2	2	2	2	2	2	2	1	2	2	1	1	0	1	1	2	0	1	1	1	1	2	2	2	2	2	2	2	2
6	Female	43	La Regina	2	2	2	2	2	2	2	2	1	2	2	2	2	2	2	2	2	2	2	2	2	2	2	2	1	2	2	2	2	2	2	2	2	2	2	2	2	2	2	2	2	2	2	2	2	2
7	Masculine	49	La Regina	-	2	2	2	2	2	-	-	2	2	1	2	2	2	2	2	2	1	2	2	2	1	2	2	2	2	2	2	2	2	2	2	2	2	2	2	2	2	2	2	2	2	2	2	2	2
8	Masculine	31	La Regina	-	2	1	1	2	1	2	1	2	2	0	1	1	0	2	2	1	0	0	0	2	2	2	1	2	0	2	2	1	0	1	1	1	1	1	2	2	2	1	0	1	1	1	2	2	2
9	Female	49	La Regina	-	1	2	2	2	1	2	2	1	2	2	1	1	2	2	1	2	1	2	2	2	2	2	1	2	2	2	1	1	1	2	2	2	2	2	2	1	2	2	1	2	1	2	2	2	2
10	Female	30	La Regina	-	1	2	2	2	1	2	2	1	2	2	1	1	2	2	1	2	1	2	2	2	2	2	1	2	2	2	1	1	1	2	2	2	2	2	2	2	2	1	2	2	1	2	2	2	2
11	Female	30	La Regina	-	2	2	1	2	1	2	1	2	1	1	1	2	0	2	2	1	-	2	2	2	2	2	1	0	0	1	2	2	1	2	1	1	1	1	1	2	2	2	0	2	2	0	2	2	2
12	Female	56	La Regina	-	0	1	2	2	2	2	2	2	2	2	2	2	2	2	1	1	2	2	1	1	1	2	2	0	2	2	0	2	1	2	1	2	2	1	1	1	2	-	1	0	1	1	1	2	2
13	Masculine	37	Basaseachi	-	1	0	2	2	2	0	2	0	2	2	2	1	-	1	1	2	2	2	2	2	2	2	1	0	0	2	0	0	1	1	2	2	1	0	2	1	0	1	0	1	0	2	1	2	2
14	Masculine	33	Basaseachi	-	1	2	1	2	2	2	2	0	-	1	1	2	1	0	0	2	2	2	1	1	0	0	0	0	0	2	0	0	1	0	1	1	1	1	1	1	1	1	0	2	1	1	1	1	2
15	N.D	N.D	Basaseachi	-	2	2	2	2	1	2	2	0	2	0	0	1	1	1	2	2	2	1	1	1	2	1	1	0	0	2	0	1	2	1	1	1	1	1	1	1	0	-	1	1	1	2	2	2	2
16	Masculine	38	Basaseachi	0	1	2	1	1	1	1	1	1	1	1	1	1	1	1	1	2	2	2	2	2	1	2	2	2	1	2	1	1	1	1	1	1	1	1	1	1	1	1	1	1	2	1	1	1	1
17	Female	34	Basaseachi	-	2	2	2	2	2	2	2	2	2	2	2	2	2	2	2	2	2	2	2	2	2	2	-	2	2	2	2	2	2	2	2	2	2	2	2	2	2	2	2	2	2	2	2	2	2
18	Masculine	54	Basaseachi	-	2	2	2	2	2	2	-	-	2	2	2	2	2	2	2	2	2	2	2	2	-	2	1	-	1	2	1	2	2	1	1	1	2	1	1	2	1	1	2	2	1	1	2	2	2
19	Female	43	Basaseachi	1	0	1	1	1	0	1	1	1	1	1	1	0	0	1	1	1	1	1	0	0	1	0	0	0	0	1	1	1	0	1	1	1	0	1	0	1	0	1	1	0	2	2	1	1	1
20	Female	40	Basaseachi	1	1	2	1	2	1	1	2	0	0	1	1	0	0	0	0	0	0	1	1	2	1	1	0	0	0	0	0	0	0	0	1	1	0	2	1	1	0	0	0	1	0	1	0	0	2
21	Female	44	Basaseachi	1	1	2	2	2	2	1	2	0	2	0	0	0	0	0	0	1	1	2	2	0	1	1	2	0	0	0	0	0	0	0	2	0	0	2	1	0	0	0	0	0	2	0	0	0	2
22	Masculine	36	Basaseachi	2	2	1	2	2	0	0	0	0	2	2	1	2	2	2	1	2	1	1	2	2	1	0	0	1	0	2	0	1	0	1	2	0	1	1	1	1	0	1	1	2	2	1	1	1	0
23	Female	36	Basaseachi	2	2	2	2	2	2	2	2	2	2	2	2	1	2	2	1	2	2	2	2	2	2	1	1	1	1	2	2	2	2	2	2	2	2	2	2	2	2	0	0	0	2	2	2	2	2
24	N.D	N.D	Basaseachi	-	2	2	2	1	2	1	1	2	-	1	2	-	2	2	2	1	1	1	1	1	1	1	1	1	1	1	-	1	1	1	1	2	2	2	2	1	1	1	1	1	1	1	1	1	-
25	Female	60	Nuevas Delicias	2	2	2	2	2	2	2	2	1	2	2	2	2	2	2	2	2	2	2	2	2	1	1	2	2	1	1	1	1	1	0	2	2	2	2	2	2	-	2	2	2	2	2	2	2	2
26	Female	37	Nuevas Delicias	2	0	2	1	1	0	1	0	2	2	2	2	2	1	1	1	0	0	1	0	1	2	1	0	2	1	2	1	0	1	2	2	1	1	1	1	2	0	1	0	0	1	1	0	1	1
27	Female	47	Nuevas Delicias	-	0	2	2	2	0	2	2	1	1	1	2	2	2	2	2	1	1	2	2	2	0	1	1	2	0	1	1	0	0	0	2	0	1	2	2	1	0	0	0	0	2	1	0	0	0
28	Masculine	50	Nuevas Delicias	0	2	2	0	2	0	2	2	0	1	2	2	2	0	2	2	0	0	2	1	0	2	2	0	0	2	0	0	0	2	1	2	2	2	1	2	2	2	0	0	0	2	2	0	0	0
29	Female	52	Nuevas Delicias	2	1	1	2	2	2	2	1	1	2	2	2	1	1	2	1	1	1	1	2	1	1	1	2	1	0	2	1	1	1	1	1	1	2	1	2	2	1	1	1	2	2	1	2	2	2
30	Female	29	Nuevas Delicias	2	1	1	2	2	1	1	2	2	2	1	2	-	2	2	2	2	2	1	1	2	2	2	1	1	1	2	2	2	2	2	2	2	2	2	2	2	2	1	1	2	2	2	1	2	2
31	Female	28	Nuevas Delicias	-	2	1	1	2	0	2	2	2	0	0	1	1	1	2	2	1	1	2	0	1	1	2	0	1	1	2	1	1	0	1	1	2	0	1	1	1	1	2	0	2	1	2	1	1	2
32	Female	35	Nuevas Delicias	2	1	2	1	2	1	1	1	1	1	0	1	2	0	1	2	1	1	2	0	0	1	2	1	1	1	1	1	2	1	2	2	2	2	1	2	2	1	2	2	2	2	2	2	2	2
33	Female	26	Nuevas Delicias	2	1	2	1	2	2	1	1	2	2	1	2	1	2	2	2	2	2	2	1	0	1	2	0	2	2	2	1	1	1	1	2	2	1	1	2	-	1	1	0	1	2	1	2	2	1
34	Masculine	35	Nuevas Delicias	2	2	2	1	2	1	1	2	1	2	0	1	1	0	0	2	1	0	2	2	2	1	2	0	2	2	2	2	2	0	2	2	2	2	2	2	2	0	2	0	2	2	2	-	2	1
35	Masculine	39	Nuevas Delicias	2	1	1	1	1	1	2	2	1	2	2	2	2	2	2	1	2	1	2	2	2	1	2	2	2	2	2	2	1	1	1	1	2	1	1	2	2	1	1	1	1	1	1	1	2	2
36	Female	23	Paso del Norte	2	0	2	1	1	0	2	2	2	2	2	2	1	1	1	1	2	1	1	1	1	1	1	1	2	2	2	1	2	2	2	2	2	2	2	2	2	2	2	2	2	1	1	2	0	0
37	Female	30	Paso del Norte	1	1	1	2	1	1	1	2	1	1	1	1	1	0	0	1	1	1	1	1	0	1	0	0	0	0	0	1	1	1	0	0	0	1	0	1	1	0	0	0	1	1	0	0	0	0
38	Female	72	Paso del Norte	2	1	2	1	1	2	2	1	2	2	1	2	0	2	2	2	1	1	2	2	0	2	2	1	1	1	2	2	1	1	2	1	1	2	1	1	1	1	2	2	1	1	1	1	1	0
39	Female	54	Paso del Norte	2	0	2	2	1	2	0	2	0	2	2	1	0	1	1	1	1	1	2	2	2	2	1	1	1	0	1	1	2	1	2	1	0	2	1	1	0	2	2	2	2	2	1	2	1	2
40	Female	56	Paso del Norte	2	0	2	2	1	1	0	1	0	2	2	1	0	1	1	0	1	1	2	2	2	2	1	1	1	0	1	1	2	1	1	0	0	2	1	1	1	1	1	1	2	2	1	2	1	2
41	Female	53	Paso del Norte	2	-	-	2	2	2	2	2	0	2	2	2	2	2	2	2	2	2	2	2	2	2	2	2	1	1	2	2	0	1	1	2	2	2	1	1	2	2	1	1	2	2	2	2	2	2
42	Female	54	Paso del Norte	2	0	2	2	1	1	-	1	0	2	0	0	1	0	0	0	0	2	0	2	2	2	2	-	2	2	2	2	2	2	2	-	-	2	0	0	0	2	2	0	0	2	1	0	1	1
43	Female	36	Paso del Norte	0	0	2	2	2	2	0	2	0	2	2	0	0	0	0	0	0	1	2	2	2	2	1	1	1	0	2	1	2	1	2	1	0	2	2	2	2	2	2	2	2	2	2	2	2	2
		Each indicator	Mode	2	1	2	2	2	2	2	2	2	2	2	2	2	2	2	2	2	1	2	2	2	2	2	1	0	2	2	1	2	1	2	1	2	2	1	2	2	2	1	0	2	2	1	2	2	2
			Mean	1.66667	1.14286	1.64286	1.55814	1.74419	1.34884	1.4878	1.58537	1.14286	1.68293	1.32558	1.4186	1.29268	1.2439	1.46512	1.30233	1.38095	1.30952	1.67442	1.44186	1.39535	1.475	1.48837	1.02439	1	1	1.62791	1.04762	1.25581	1.02381	1.27907	1.42857	1.33333	1.44186	1.34884	1.4186	1.40476	1.19048	1.2439	0.883721	1.2093	1.4186	1.39535	1.35714	1.4186	1.54762
			Median	2	1	2	2	2	2	2	2	1	2	2	2	1	2	2	1	1.5	1	2	2	2	2	2	1	1	1	2	1	1	1	1	1	2	2	1	1	1.5	1	1	1	1	2	1	2	2	2
			Standard deviation	0.620174	0.751305	0.53289	0.547824	0.441481	0.752258	0.711405	0.590576	0.84309	0.567407	0.778305	0.663058	0.749797	0.859665	0.766838	0.741134	0.696765	0.680319	0.565725	0.700419	0.791007	0.598609	0.66805	0.757885	0.826394	0.845154	0.655499	0.730933	0.758853	0.715272	0.73438	0.590281	0.786057	0.700419	0.612711	0.62612	0.664777	0.803592	0.734183	0.85103	0.860734	0.698043	0.622573	0.759378	0.763219	0.739228
			Mean desviation	0.493827	0.612245	0.47619	0.513791	0.380746	0.666306	0.624628	0.525877	0.734694	0.46401	0.690103	0.594916	0.655562	0.774539	0.671714	0.648999	0.619048	0.591837	0.469443	0.623039	0.703083	0.55125	0.594916	0.571089	0.666667	0.697674	0.536506	0.544218	0.657653	0.511338	0.637101	0.544218	0.698413	0.623039	0.54516	0.567875	0.595238	0.693878	0.627008	0.739859	0.772309	0.621958	0.562466	0.673469	0.676041	0.624717
			Variance	0.384615	0.56446	0.283972	0.300111	0.194906	0.565891	0.506098	0.34878	0.710801	0.321951	0.605759	0.439646	0.562195	0.739024	0.58804	0.54928	0.485482	0.462834	0.320044	0.490587	0.625692	0.358333	0.44629	0.57439	0.682927	0.714286	0.429679	0.534262	0.575858	0.511614	0.539313	0.348432	0.617886	0.490587	0.375415	0.392027	0.441928	0.645761	0.539024	0.724252	0.740864	0.487265	0.387597	0.576655	0.582503	0.546458
			Coefficient of variation	0.372104	0.657392	0.324368	0.351588	0.253116	0.557708	0.478158	0.372517	0.737704	0.337155	0.587142	0.467401	0.580031	0.691103	0.523397	0.569085	0.504554	0.519516	0.337863	0.485775	0.566888	0.405837	0.448846	0.73984	0.826394	0.845154	0.402664	0.697708	0.604272	0.698638	0.574151	0.413197	0.589543	0.485775	0.454252	0.441363	0.473231	0.675018	0.590225	0.963008	0.711761	0.492063	0.446177	0.559542	0.538007	0.477655
			Maximum limit	2.28684	1.89416	2.17575	2.10596	2.18567	2.10109	2.19921	2.17594	1.98595	2.25033	2.10389	2.08166	2.04248	2.10357	2.23195	2.04346	2.07772	1.98984	2.24014	2.14228	2.18636	2.07361	2.15642	1.78228	1.82639	1.84515	2.28341	1.77855	2.01467	1.73908	2.01345	2.01885	2.11939	2.14228	1.96155	2.04472	2.06954	1.99407	1.97809	1.73475	2.07004	2.11665	2.01792	2.11652	2.18182	2.28685
			Minimum limit	1.50617	0.387755	1.52381	1.48621	1.61925	1.33369	1.37537	1.47412	0.265306	1.53599	1.3099	1.40508	0.344438	1.22546	1.32829	0.351001	0.880952	0.408163	1.53056	1.37696	1.29692	1.44875	1.40508	0.428911	0.333333	0.302326	1.46349	0.455782	0.342347	0.488662	0.362899	0.455782	1.30159	1.37696	0.45484	0.432125	0.904762	0.306122	0.372992	0.260141	0.227691	1.37804	0.437534	1.32653	1.32396	1.37528
					Ecological	Social
		Total indicators	Mode	2	2	2
			Mean	1.35823	1.43908	1.30558
			Median	2	2	1
			Standard deviation	0.733782	0.702114	0.749282
			Mean desviation	0.657646	0.630608	0.666602
			Variance	0.538435	0.492963	0.561423
			Coefficient of variation	0	0.487889	0.573908
			Maximum limit	2.09201	2.1412	2.05486
			Minimum limit	1.34235	1.36939	0.333398
[truncated: 4 more columns]

## Sheet: Freq
	I1					I6					I11					I16					I21					I26					I31					I36					I41					I46
	Answer	Frequency	Percentage			Answer	Frequency	Percentage			Answer	Frequency	Percentage			Answer	Frequency	Percentage			Answer	Frequency	Percentage			Answer	Frequency	Percentage			Answer	Frequency	Percentage			Respuestas	Frecuencia	Porcentaje			Answer	Frequency	Percentage			Answer	Frequency	Percentage
0	Nothing important	2	0		0	Nothing important	7	0.162791		0	Nothing important	8	0.186047		0	Nothing important	7	0.162791		0	Nothing important	8	0.186047		0	Nothing important	15	0.348837		0	Nothing important	7	0.162791		0	Nothing important	3	0.0697674		0	Nothing important	12	0.27907		0	Nothing important	6	0.139535
1	Something important	5	0.116279		1	Something important	14	0.325581		1	Something important	13	0.302326		1	Something important	16	0.372093		1	Something important	10	0.232558		1	Something important	13	0.302326		1	Something important	17	0.395349		1	Something important	19	0.44186		1	Something important	10	0.232558		1	Something important	7	0.162791
2	Very important	20	0.465116		2	Very important	22	0.511628		2	Very important	22	0.511628		2	Very important	20	0.465116		2	Very important	25	0.581395		2	Very important	15	0.348837		2	Very important	19	0.44186		2	Very important	21	0.488372		2	Very important	21	0.488372		2	Very important	29	0.674419
-	Missing data	16	0.372093		-	Missing data	0	0		-	Missing data	0	0		-	Missing data	0	0		-	Missing data	0	0		-	Missing data	0	0		-	Missing data	0	0		-	Missing data	0	0		-	Missing data	0	0		-	Missing data	1	0.0232558
	Total	43	1			Total	43	1			Total	43	1			Total	43	1			Total	43	1			Total	43	1			Total	43	1			Total	43	1			Total	43	1			Total	43	1
	I2					I7					I12					I17					I22					I27					I32					I37					I42					I47
	Answer	Frequency	Percentage			Answer	Frequency	Percentage			Answer	Frequency	Percentage			Answer	Frequency	Percentage			Answer	Frequency	Percentage			Answer	Frequency	Percentage			Answer	Frequency	Percentage			Answer	Frequency	Percentage			Answer	Frequency	Percentage			Answer	Frequency	Percentage
0	Nothing important	9	0.209302		0	Nothing important	5	0.116279		0	Nothing important	4	0.0930233		0	Nothing important	5	0.116279		0	Nothing important	2	0.0465116		0	Nothing important	4	0.0930233		0	Nothing important	2	0.0465116		0	Nothing important	4	0.0930233		0	Nothing important	5	0.116279		0	Nothing important	7	0.162791
1	Something important	18	0.418605		1	Something important	11	0.255814		1	Something important	17	0.395349		1	Something important	16	0.372093		1	Something important	17	0.395349		1	Something important	8	0.186047		1	Something important	20	0.465116		1	Something important	17	0.395349		1	Something important	15	0.348837		1	Something important	10	0.232558
2	Very important	15	0.348837		2	Very important	25	0.581395		2	Very important	22	0.511628		2	Very important	21	0.488372		2	Very important	21	0.488372		2	Very important	31	0.72093		2	Very important	20	0.465116		2	Very important	21	0.488372		2	Very important	23	0.534884		2	Very important	26	0.604651
-	Missing data	1	0.0232558		-	Missing data	2	0.0465116		-	Missing data	0	0		-	Missing data	1	0.0232558		-	Missing data	3	0.0697674		-	Missing data	0	0		-	Missing data	1	0.0232558		-	Missing data	1	0.0232558		-	Missing data	0	0		-	Missing data	0	0
	Total	43	1			Total	43	1			Total	43	1			Total	43	1			Total	43	1			Total	43	1			Total	43	1			Total	43	1			Total	43	1			Total	43	1
	I3					I8					I13					I18					I23					I28					I33					I38					I43					I48
	Answer	Frequency	Percentage			Answer	Frequency	Percentage			Answer	Frequency	Percentage			Answer	Frequency	Percentage			Answer	Frequency	Percentage			Answer	Frequency	Percentage			Answer	Frequency	Percentage			Answer	Frequency	Percentage			Answer	Frequency	Percentage			Answer	Frequency	Percentage
0	Nothing important	1	0.0232558		0	Nothing important	2	0.0465116		0	Nothing important	7	0.162791		0	Nothing important	5	0.116279		0	Nothing important	4	0.0930233		0	Nothing important	10	0.232558		0	Nothing important	8	0.186047		0	Nothing important	10	0.232558		0	Nothing important	3	0.0697674		0	Nothing important	11	0.255814
1	Something important	13	0.302326		1	Something important	13	0.302326		1	Something important	15	0.348837		1	Something important	19	0.44186		1	Something important	14	0.325581		1	Something important	20	0.465116		1	Something important	12	0.27907		1	Something important	14	0.325581		1	Something important	20	0.465116		1	Something important	11	0.255814
2	Very important	28	0.651163		2	Very important	26	0.604651		2	Very important	19	0.44186		2	Very important	18	0.418605		2	Very important	25	0.581395		2	Very important	12	0.27907		2	Very important	22	0.511628		2	Very important	18	0.418605		2	Very important	20	0.465116		2	Very important	20	0.465116
-	Missing data	1	0.0232558		-	Missing data	2	0.0465116		-	Missing data	2	0.0465116		-	Missing data	1	0.0232558		-	Missing data	0	0		-	Missing data	1	0.0232558		-	Missing data	1	0.0232558		-	Missing data	1	0.0232558		-	Missing data	0	0		-	Missing data	1	0.0232558
	Total	43	1			Total	43	1			Total	43	1			Total	43	1			Total	43	1			Total	43	1			Total	43	1			Total	43	1			Total	43	1			Total	43	1
	I4					I9					I14					I19					I24					I29					I34					I39					I44					I49
	Answer	Frequency	Percentage			Answer	Frequency	Percentage			Answer	Frequency	Percentage			Answer	Frequency	Percentage			Answer	Frequency	Percentage			Answer	Frequency	Percentage			Answer	Frequency	Percentage			Answer	Frequency	Percentage			Answer	Frequency	Percentage			Answer	Frequency	Percentage
0	Nothing important	1	0.0232558		0	Nothing important	12	0.27907		0	Nothing important	11	0.255814		0	Nothing important	2	0.0465116		0	Nothing important	11	0.255814		0	Nothing important	8	0		0	Nothing important	5	0.116279		0	Nothing important	7	0.162791		0	Nothing important	7	0.162791		0	Nothing important	3	0.0697674
1	Something important	17	0.395349		1	Something important	12	0.27907		1	Something important	9	0.209302		1	Something important	10	0.232558		1	Something important	18	0.418605		1	Something important	16	0.302326		1	Something important	14	0.325581		1	Something important	17	0.395349		1	Something important	13	0.302326		1	Something important	13	0.302326
2	Very important	25	0.581395		2	Very important	18	0.418605		2	Very important	21	0.488372		2	Very important	31	0.72093		2	Very important	12	0.27907		2	Very important	19	0.511628		2	Very important	24	0.55814		2	Very important	17	0.395349		2	Very important	22	0.511628		2	Very important	27	0.627907
-	Missing data	0	0		-	Missing data	1	0.0232558		-	Missing data	2	0.0465116		-	Missing data	0	0		-	Missing data	2	0.0465116		-	Missing data	0	0		-	Missing data	0	0		-	Missing data	2	0.0465116		-	Missing data	1	0.0232558		-	Missing data	0	0
	Total	43	1			Total	43	1			Total	43	1			Total	43	1			Total	43	1			Total	43	1			Total	43	1			Total	43	1			Total	43	1			Total	43	1
	I5					I10					I15					I20					I25					I30					I35					I40					I45					I50
	Answer	Frequency	Percentage			Answer	Frequency	Percentage			Answer	Frequency	Percentage			Answer	Frequency	Percentage			Answer	Frequency	Percentage			Answer	Frequency	Percentage			Answer	Frequency	Percentage			Answer	Frequency	Percentage			Answer	Frequency	Percentage			Answer	Frequency	Percentage
0	Nothing important	0	0		0	Nothing important	2	0.0465116		0	Nothing important	7	0.162791		0	Nothing important	5	0.116279		0	Nothing important	14	0.325581		0	Nothing important	10	0.232558		0	Nothing important	3	0.0697674		0	Nothing important	18	0.418605		0	Nothing important	7	0.162791		0	Nothing important	8	0.186047
1	Something important	11	0.255814		1	Something important	9	0.209302		1	Something important	9	0.209302		1	Something important	14	0.325581		1	Something important	14	0.325581		1	Something important	21	0.488372		1	Something important	22	0.511628		1	Something important	12	0.27907		1	Something important	11	0.255814		1	Something important	15	0.348837
2	Very important	32	0.744186		2	Very important	30	0.697674		2	Very important	27	0.627907		2	Very important	24	0.55814		2	Very important	14	0.325581		2	Very important	11	0.255814		2	Very important	18	0.418605		2	Very important	13	0.302326		2	Very important	25	0.581395		2	Very important	20	0.465116
-	Missing data	0	0		-	Missing data	2	0.0465116		-	Missing data	0	0		-	Missing data	0	0		-	Missing data	1	0.0232558		-	Missing data	1	0.0232558		-	Missing data	0	0		-	Missing data	0	0		-	Missing data	0	0		-	Missing data	0	0
	Total	43	1			Total	43	1			Total	43	1			Total	43	1			Total	43	1			Total	43	1			Total	43	1			Total	43	1			Total	43	1			Total	43	1
	Answer	Frequency	Percentage
0	Nothing important	324	0.150698
1	Something important	701	0.326047
2	Very important	1077	0.50093
-	Missing data	48	0.0223256
	Total	2150	1
	La Regina					Basaseachi					Nuevas Delicias					Paso del Norte
	Answer	Frequency	Percentage			Answer	Frequency	Percentage			Answer	Frequency	Percentage			Answer	Frequency	Percentage
0	Nothing important	46	0.0766667		0	Nothing important	121	0.201667		0	Nothing important	77	0.14		0	Nothing important	80	0.2
1	Something important	150	0.25		1	Something important	225	0.375		1	Something important	189	0.343636		1	Something important	137	0.3425
2	Very important	387	0.645		2	Very important	236	0.393333		2	Very important	278	0.505455		2	Very important	176	0.44
-	Missing data	17	0.0283333		-	Missing data	18	0.03		-	Missing data	6	0.0109091		-	Missing data	7	0.0175
	Total	600	1			Total	600	1			Total	550	1			Total	400	1

## Sheet: La Regina
		Indicator Code
	La Regina id	I1	I2	I3	I4	I5	I6	I7	I8	I9	I10	I11	I12	I13	I14	I15	I16	I17	I18	I19	I20	I21	I22	I23	I24	I25	I26	I27	I28	I29	I30	I31	I32	I33	I34	I35	I36	I37	I38	I39	I40	I41	I42	I43	I44	I45	I46	I47	I48
	1	2	1	1	2	2	2	2	2	2	2	2	2	2	2	2	1	2	2	2	1	0	-	1	2	0	1	2	1	2	1	1	1	2	1	2	0	1	2	1	0	0	0	1	1	0	2	2	2
	2	-	1	1	2	2	2	2	2	2	2	2	2	2	2	2	1	1	2	2	1	1	-	2	2	0	2	2	0	2	-	2	1	0	2	2	1	2	2	2	2	0	0	2	1	2	2	2	2
	3	2	1	1	1	2	2	2	2	2	2	0	1	1	2	2	2	2	2	2	1	2	2	2	0	0	2	2	1	2	2	2	2	2	1	2	2	2	1	0	0	0	0	1	2	2	2	2	2
	4	-	1	1	1	2	2	2	1	2	1	1	1	2	-	2	0	-	1	2	1	1	2	2	1	0	1	2	0	2	0	0	1	1	2	1	1	0	1	2	0	0	1	2	2	2	1	2	2
	5	2	2	2	1	2	2	2	1	2	1	2	2	2	2	2	2	2	2	2	2	2	2	2	2	1	2	2	1	1	0	1	1	2	0	1	1	1	1	2	2	2	2	2	2	2	2	2	2
	6	2	2	2	2	2	2	2	2	1	2	2	2	2	2	2	2	2	2	2	2	2	2	2	2	1	2	2	2	2	2	2	2	2	2	2	2	2	2	2	2	2	2	2	2	2	2	2	2
	7	-	2	2	2	2	2	-	-	2	2	1	2	2	2	2	2	2	1	2	2	2	1	2	2	2	2	2	2	2	2	2	2	2	2	2	2	2	2	2	2	2	2	2	2	2	2	2	2
	8	-	2	1	1	2	1	2	1	2	2	0	1	1	0	2	2	1	0	0	0	2	2	2	1	2	0	2	2	1	0	1	1	1	1	1	2	2	2	1	0	1	1	1	2	2	2	2	2
	9	-	1	2	2	2	1	2	2	1	2	2	1	1	2	2	1	2	1	2	2	2	2	2	1	2	2	2	1	1	1	2	2	2	2	2	2	1	2	2	1	2	1	2	2	2	2	2	2
	10	-	1	2	2	2	1	2	2	1	2	2	1	1	2	2	1	2	1	2	2	2	2	2	1	2	2	2	1	1	1	2	2	2	2	2	2	2	2	1	2	2	1	2	2	2	2	2	2
	11	-	2	2	1	2	1	2	1	2	1	1	1	2	0	2	2	1	-	2	2	2	2	2	1	0	0	1	2	2	1	2	1	1	1	1	1	2	2	2	0	2	2	0	2	2	2	2	2
	12	-	0	1	2	2	2	2	2	2	2	2	2	2	2	2	1	1	2	2	1	1	1	2	2	0	2	2	0	2	1	2	1	2	2	1	1	1	2	-	1	0	1	1	1	2	2	2	2
Each indicator	Mode	2	1	1	2	2	2	2	2	2	2	2	2	2	2	2	2	2	2	2	2	2	2	2	2	0	2	2	1	2	1	2	1	2	2	2	2	2	2	2	0	2	1	2	2	2	2	2	2
	Mean	2	1.33333	1.5	1.58333	2	1.66667	2	1.63636	1.75	1.75	1.41667	1.5	1.66667	1.63636	2	1.41667	1.63636	1.45455	1.83333	1.41667	1.58333	1.8	1.91667	1.41667	0.833333	1.5	1.91667	1.08333	1.66667	1	1.58333	1.41667	1.58333	1.5	1.58333	1.41667	1.5	1.75	1.54545	1	1.08333	1.08333	1.5	1.75	1.83333	1.91667	2	2
	Median	2	1	1.5	2	2	2	2	2	2	2	2	1.5	2	2	2	1.5	2	2	2	1.5	2	2	2	1.5	0.5	2	2	1	2	1	2	1	2	2	2	1.5	2	2	2	1	1.5	1	2	2	2	2	2	2
	Standard deviation	0	0.651339	0.522233	0.514929	0	0.492366	0	0.504525	0.452267	0.452267	0.792961	0.522233	0.492366	0.80904	0	0.668558	0.504525	0.687552	0.57735	0.668558	0.668558	0.421637	0.288675	0.668558	0.937437	0.797724	0.288675	0.792961	0.492366	0.774597	0.668558	0.514929	0.668558	0.6742	0.514929	0.668558	0.6742	0.452267	0.687552	0.953463	0.996205	0.792961	0.6742	0.452267	0.57735	0.288675	0	0
	Mean desviation	0	0.555556	0.5	0.486111	0	0.444444	0	0.46281	0.375	0.375	0.680556	0.5	0.444444	0.595041	0	0.583333	0.46281	0.595041	0.305556	0.583333	0.555556	0.32	0.152778	0.583333	0.833333	0.666667	0.152778	0.611111	0.444444	0.545455	0.555556	0.486111	0.555556	0.583333	0.486111	0.583333	0.583333	0.375	0.578512	0.833333	0.916667	0.611111	0.583333	0.375	0.305556	0.152778	0	0
	Variance	0	0.424242	0.272727	0.265152	0	0.242424	0	0.254545	0.204545	0.204545	0.628788	0.272727	0.242424	0.654545	0	0.44697	0.254545	0.472727	0.333333	0.44697	0.44697	0.177778	0.0833333	0.44697	0.878788	0.636364	0.0833333	0.628788	0.242424	0.6	0.44697	0.265152	0.44697	0.454545	0.265152	0.44697	0.454545	0.204545	0.472727	0.909091	0.992424	0.628788	0.454545	0.204545	0.333333	0.0833333	0	0
	Coefficient of variation	0	0.488504	0.348155	0.325218	0	0.29542	0	0.308321	0.258438	0.258438	0.559738	0.348155	0.29542	0.494413	0	0.471923	0.308321	0.472692	0.314918	0.471923	0.422247	0.234243	0.150613	0.471923	1.12492	0.531816	0.150613	0.731964	0.29542	0.774597	0.422247	0.363479	0.422247	0.449467	0.325218	0.471923	0.449467	0.258438	0.444886	0.953463	0.919574	0.731964	0.449467	0.258438	0.314918	0.150613	0	0
	Maximum limit	2	0.681994	0.977767	1.0684	2	1.1743	2	1.13184	1.29773	1.29773	0.623705	0.977767	1.1743	0.827324	2	0.748109	1.13184	0.766994	1.25598	0.748109	0.914775	1.37836	1.62799	0.748109	-0.104104	0.702276	1.62799	0.290372	1.1743	0.225403	0.914775	0.901738	0.914775	0.8258	1.0684	0.748109	0.8258	1.29773	0.857903	0.0465374	0.0871284	0.290372	0.8258	1.29773	1.25598	1.62799	2	2
	Minimum limit	2	1.55556	2	2.48611	2	2.44444	2	2.46281	2.375	2.375	2.68056	2	2.44444	2.59504	2	2.08333	2.46281	2.59504	2.30556	2.08333	2.55556	2.32	2.15278	2.08333	1.33333	2.66667	2.15278	1.61111	2.44444	1.54545	2.55556	1.48611	2.55556	2.58333	2.48611	2.08333	2.58333	2.375	2.57851	1.83333	2.41667	1.61111	2.58333	2.375	2.30556	2.15278	2	2
Total indicators	Mode	2
	Mean	1.58491
	Median	2
	Standard deviation	0.63347
	Mean desviation	0.551086
	Variance	0.401284
	Coefficient of variation	0.399689
	Maximum limit	2.21838
	Minimum limit	2.55109
Community weighting using the mode
Answer		Percentage
Nothing important	2	0.04
Something important	6	0.12
Very important	42	0.84
Total	50	1
[truncated: 2 more columns]

## Sheet:  Basaseachi 
		Indicator Code
	Basaseachi id	I1	I2	I3	I4	I5	I6	I7	I8	I9	I10	I11	I12	I13	I14	I15	I16	I17	I18	I19	I20	I21	I22	I23	I24	I25	I26	I27	I28	I29	I30	I31	I32	I33	I34	I35	I36	I37	I38	I39	I40	I41	I42	I43	I44	I45	I46	I47	I48
	13	-	1	0	2	2	2	0	2	0	2	2	2	1	-	1	1	2	2	2	2	2	2	2	1	0	0	2	0	0	1	1	2	2	1	0	2	1	0	1	0	1	0	2	1	2	2	0	2
	14	-	1	2	1	2	2	2	2	0	-	1	1	2	1	0	0	2	2	2	1	1	0	0	0	0	0	2	0	0	1	0	1	1	1	1	1	1	1	1	0	2	1	1	1	1	2	1	0
	15	-	2	2	2	2	1	2	2	0	2	0	0	1	1	1	2	2	2	1	1	1	2	1	1	0	0	2	0	1	2	1	1	1	1	1	1	1	0	-	1	1	1	2	2	2	2	1	0
	16	0	1	2	1	1	1	1	1	1	1	1	1	1	1	1	1	2	2	2	2	2	1	2	2	2	1	2	1	1	1	1	1	1	1	1	1	1	1	1	1	1	2	1	1	1	1	1	1
	17	-	2	2	2	2	2	2	2	2	2	2	2	2	2	2	2	2	2	2	2	2	2	2	-	2	2	2	2	2	2	2	2	2	2	2	2	2	2	2	2	2	2	2	2	2	2	2	2
	18	-	2	2	2	2	2	2	-	-	2	2	2	2	2	2	2	2	2	2	2	2	-	2	1	-	1	2	1	2	2	1	1	1	2	1	1	2	1	1	2	2	1	1	2	2	2	2	2
	19	1	0	1	1	1	0	1	1	1	1	1	1	0	0	1	1	1	1	1	0	0	1	0	0	0	0	1	1	1	0	1	1	1	0	1	0	1	0	1	1	0	2	2	1	1	1	1	0
	20	1	1	2	1	2	1	1	2	0	0	1	1	0	0	0	0	0	0	1	1	2	1	1	0	0	0	0	0	0	0	0	1	1	0	2	1	1	0	0	0	1	0	1	0	0	2	1	0
	21	1	1	2	2	2	2	1	2	0	2	0	0	0	0	0	0	1	1	2	2	0	1	1	2	0	0	0	0	0	0	0	2	0	0	2	1	0	0	0	0	0	2	0	0	0	2	0	0
	22	2	2	1	2	2	0	0	0	0	2	2	1	2	2	2	1	2	1	1	2	2	1	0	0	1	0	2	0	1	0	1	2	0	1	1	1	1	0	1	1	2	2	1	1	1	0	0	0
	23	2	2	2	2	2	2	2	2	2	2	2	2	1	2	2	1	2	2	2	2	2	2	1	1	1	1	2	2	2	2	2	2	2	2	2	2	2	2	0	0	0	2	2	2	2	2	1	1
	24	-	2	2	2	1	2	1	1	2	-	1	2	-	2	2	2	1	1	1	1	1	1	1	1	1	1	1	-	1	1	1	1	2	2	2	2	1	1	1	1	1	1	1	1	1	-	1	1
Each indicator	Mode	1	2	2	2	2	2	2	2	0	2	2	2	1	2	2	1	2	2	2	2	2	1	1	1	0	0	2	0	1	1	1	1	1	1	1	1	1	0	1	0	1	2	1	1	2	2	1	0
	Mean	1.16667	1.41667	1.66667	1.66667	1.75	1.41667	1.25	1.54545	0.727273	1.6	1.25	1.25	1.09091	1.18182	1.16667	1.08333	1.58333	1.5	1.58333	1.5	1.41667	1.27273	1.08333	0.818182	0.636364	0.5	1.5	0.636364	0.916667	1	0.916667	1.41667	1.16667	1.08333	1.33333	1.25	1.16667	0.666667	0.818182	0.75	1.08333	1.33333	1.33333	1.16667	1.25	1.63636	0.916667	0.75
	Median	1	1.5	2	2	2	2	1	2	0	2	1	1	1	1	1	1	2	2	2	2	2	1	1	1	0	0	2	0	1	1	1	1	1	1	1	1	1	0.5	1	1	1	1.5	1	1	1	2	1	0.5
	Standard deviation	0.752773	0.668558	0.651339	0.492366	0.452267	0.792961	0.753778	0.687552	0.904534	0.699206	0.753778	0.753778	0.831209	0.873863	0.834847	0.792961	0.668558	0.6742	0.514929	0.6742	0.792961	0.64667	0.792961	0.750757	0.80904	0.6742	0.797724	0.80904	0.792961	0.852803	0.668558	0.514929	0.717741	0.792961	0.651339	0.621582	0.57735	0.778499	0.603023	0.753778	0.792961	0.778499	0.651339	0.717741	0.753778	0.6742	0.668558	0.866025
	Mean desviation	0.555556	0.583333	0.5	0.444444	0.375	0.680556	0.625	0.578512	0.793388	0.56	0.625	0.625	0.661157	0.743802	0.694444	0.611111	0.555556	0.583333	0.486111	0.583333	0.680556	0.528926	0.611111	0.595041	0.694215	0.583333	0.666667	0.694215	0.611111	0.666667	0.458333	0.486111	0.555556	0.611111	0.555556	0.5	0.416667	0.666667	0.446281	0.625	0.611111	0.666667	0.555556	0.555556	0.625	0.528926	0.458333	0.75
	Variance	0.566667	0.44697	0.424242	0.242424	0.204545	0.628788	0.568182	0.472727	0.818182	0.488889	0.568182	0.568182	0.690909	0.763636	0.69697	0.628788	0.44697	0.454545	0.265152	0.454545	0.628788	0.418182	0.628788	0.563636	0.654545	0.454545	0.636364	0.654545	0.628788	0.727273	0.44697	0.265152	0.515152	0.628788	0.424242	0.386364	0.333333	0.606061	0.363636	0.568182	0.628788	0.606061	0.424242	0.515152	0.568182	0.454545	0.44697	0.75
	Coefficient of variation	0.645234	0.471923	0.390803	0.29542	0.258438	0.559738	0.603023	0.444886	1.24373	0.437004	0.603023	0.603023	0.761942	0.739422	0.715583	0.731964	0.422247	0.449467	0.325218	0.449467	0.559738	0.508098	0.731964	0.917592	1.27135	1.3484	0.531816	1.27135	0.865049	0.852803	0.729336	0.363479	0.615206	0.731964	0.488504	0.497265	0.494872	1.16775	0.737028	1.00504	0.731964	0.583874	0.488504	0.615206	0.603023	0.412011	0.729336	1.1547
	Maximum limit	1.91944	2.08522	2.31801	2.15903	2.20227	2.20963	2.00378	2.23301	1.63181	2.29921	2.00378	2.00378	1.92212	2.05568	2.00151	1.87629	2.25189	2.1742	2.09826	2.1742	2.20963	1.9194	1.87629	1.56894	1.4454	1.1742	2.29772	1.4454	1.70963	1.8528	1.58522	1.9316	1.88441	1.87629	1.98467	1.87158	1.74402	1.44517	1.4212	1.50378	1.87629	2.11183	1.98467	1.88441	2.00378	2.31056	1.58522	1.61603
	Minimum limit	0.444444	0.916667	1.5	1.55556	1.625	1.31944	0.375	1.42149	-0.793388	1.44	0.375	0.375	0.338843	0.256198	0.305556	0.388889	1.44444	1.41667	1.51389	1.41667	1.31944	0.471074	0.388889	0.404959	-0.694215	-0.583333	1.33333	-0.694215	0.388889	0.333333	0.541667	0.513889	0.444444	0.388889	0.444444	0.5	0.583333	-0.166667	0.553719	0.375	0.388889	0.833333	0.444444	0.444444	0.375	1.47107	0.541667	-0.25
Total indicators	Mode	2
	Mean	1
	Median	0.758516
	Standard deviation	0.650748
	Mean desviation	0.575347
	Variance	0.575347
	Coefficient of variation	0.650748
	Maximum limit	1.65075
	Minimum limit	0.183169
Community weighting using the mode
Answer		Percentage
Nothing important	7	0.14
Something important	21	0.42
Very important	22	0.44
Total	50	1
[truncated: 2 more columns]

## Sheet: N. Delicias 
		Indicator Code
	Nueva Delicias id	I1	I2	I3	I4	I5	I6	I7	I8	I9	I10	I11	I12	I13	I14	I15	I16	I17	I18	I19	I20	I21	I22	I23	I24	I25	I26	I27	I28	I29	I30	I31	I32	I33	I34	I35	I36	I37	I38	I39	I40	I41	I42	I43	I44	I45	I46	I47	I48
	25	2	2	2	2	2	2	2	2	1	2	2	2	2	2	2	2	2	2	2	2	2	1	1	2	2	1	1	1	1	1	0	2	2	2	2	2	2	-	2	2	2	2	2	2	2	2	2	1
	26	2	0	2	1	1	0	1	0	2	2	2	2	2	1	1	1	0	0	1	0	1	2	1	0	2	1	2	1	0	1	2	2	1	1	1	1	2	0	1	0	0	1	1	0	1	1	2	1
	27	-	0	2	2	2	0	2	2	1	1	1	2	2	2	2	2	1	1	2	2	2	0	1	1	2	0	1	1	0	0	0	2	0	1	2	2	1	0	0	0	0	2	1	0	0	0	0	0
	28	0	2	2	0	2	0	2	2	0	1	2	2	2	0	2	2	0	0	2	1	0	2	2	0	0	2	0	0	0	2	1	2	2	2	1	2	2	2	0	0	0	2	2	0	0	0	0	0
	29	2	1	1	2	2	2	2	1	1	2	2	2	1	1	2	1	1	1	1	2	1	1	1	2	1	0	2	1	1	1	1	1	1	2	1	2	2	1	1	1	2	2	1	2	2	2	2	2
	30	2	1	1	2	2	1	1	2	2	2	1	2	-	2	2	2	2	2	1	1	2	2	2	1	1	1	2	2	2	2	2	2	2	2	2	2	2	2	1	1	2	2	2	1	2	2	2	1
	31	-	2	1	1	2	0	2	2	2	0	0	1	1	1	2	2	1	1	2	0	1	1	2	0	1	1	2	1	1	0	1	1	2	0	1	1	1	1	2	0	2	1	2	1	1	2	2	1
	32	2	1	2	1	2	1	1	1	1	1	0	1	2	0	1	2	1	1	2	0	0	1	2	1	1	1	1	1	2	1	2	2	2	2	1	2	2	1	2	2	2	2	2	2	2	2	2	1
	33	2	1	2	1	2	2	1	1	2	2	1	2	1	2	2	2	2	2	2	1	0	1	2	0	2	2	2	1	1	1	1	2	2	1	1	2	-	1	1	0	1	2	1	2	2	1	2	2
	34	2	2	2	1	2	1	1	2	1	2	0	1	1	0	0	2	1	0	2	2	2	1	2	0	2	2	2	2	2	0	2	2	2	2	2	2	2	0	2	0	2	2	2	-	2	1	1	2
	35	2	1	1	1	1	1	2	2	1	2	2	2	2	2	2	1	2	1	2	2	2	1	2	2	2	2	2	2	1	1	1	1	2	1	1	2	2	1	1	1	1	1	1	1	2	2	1	2
Each indicator	Mode	2	1	2	1	2	0	2	2	1	2	2	2	2	2	2	2	1	1	2	2	2	1	2	0	2	1	2	1	1	1	1	2	2	2	1	2	2	1	1	0	2	2	2	2	2	2	2	1
	Mean	1.77778	1.18182	1.63636	1.27273	1.81818	0.909091	1.54545	1.54545	1.27273	1.54545	1.18182	1.72727	1.6	1.18182	1.63636	1.72727	1.18182	1	1.72727	1.18182	1.18182	1.18182	1.63636	0.818182	1.45455	1.18182	1.54545	1.18182	1	0.909091	1.18182	1.72727	1.63636	1.45455	1.36364	1.81818	1.8	0.9	1.18182	0.636364	1.27273	1.72727	1.54545	1.1	1.45455	1.36364	1.45455	1.18182
	Median	2	1	2	1	2	1	2	2	1	2	1	2	2	1	2	2	1	1	2	1	1	1	2	1	2	1	2	1	1	1	1	2	2	2	1	2	2	1	1	0	2	2	2	1	2	2	2	1
	Standard deviation	0.666667	0.750757	0.504525	0.64667	0.40452	0.831209	0.522233	0.687552	0.64667	0.687552	0.873863	0.467099	0.516398	0.873863	0.6742	0.467099	0.750757	0.774597	0.467099	0.873863	0.873863	0.603023	0.504525	0.873863	0.687552	0.750757	0.687552	0.603023	0.774597	0.700649	0.750757	0.467099	0.6742	0.687552	0.504525	0.40452	0.421637	0.737865	0.750757	0.80904	0.904534	0.467099	0.522233	0.875595	0.8202	0.80904	0.8202	0.750757
	Mean desviation	0.395062	0.595041	0.46281	0.528926	0.297521	0.661157	0.495868	0.578512	0.528926	0.578512	0.743802	0.396694	0.48	0.743802	0.528926	0.396694	0.595041	0.545455	0.396694	0.743802	0.743802	0.446281	0.46281	0.743802	0.595041	0.595041	0.578512	0.446281	0.545455	0.495868	0.595041	0.396694	0.528926	0.595041	0.46281	0.297521	0.32	0.54	0.595041	0.694215	0.793388	0.396694	0.495868	0.72	0.694215	0.694215	0.694215	0.595041
	Variance	0.444444	0.563636	0.254545	0.418182	0.163636	0.690909	0.272727	0.472727	0.418182	0.472727	0.763636	0.218182	0.266667	0.763636	0.454545	0.218182	0.563636	0.6	0.218182	0.763636	0.763636	0.363636	0.254545	0.763636	0.472727	0.563636	0.472727	0.363636	0.6	0.490909	0.563636	0.218182	0.454545	0.472727	0.254545	0.163636	0.177778	0.544444	0.563636	0.654545	0.818182	0.218182	0.272727	0.766667	0.672727	0.654545	0.672727	0.563636
	Coefficient of variation	0.375	0.635256	0.308321	0.508098	0.222486	0.91433	0.337915	0.444886	0.508098	0.444886	0.739422	0.270426	0.322749	0.739422	0.412011	0.270426	0.635256	0.774597	0.270426	0.739422	0.739422	0.51025	0.308321	1.06805	0.472692	0.635256	0.444886	0.51025	0.774597	0.770714	0.635256	0.270426	0.412011	0.472692	0.369985	0.222486	0.234243	0.81985	0.635256	1.27135	0.710705	0.270426	0.337915	0.795995	0.563887	0.593296	0.563887	0.635256
	Maximum limit	2.44444	1.93258	2.14089	1.9194	2.2227	1.7403	2.06769	2.23301	1.9194	2.23301	2.05568	2.19437	2.1164	2.05568	2.31056	2.19437	1.93258	1.7746	2.19437	2.05568	2.05568	1.78484	2.14089	1.69204	2.1421	1.93258	2.23301	1.78484	1.7746	1.60974	1.93258	2.19437	2.31056	2.1421	1.86816	2.2227	2.22164	1.63786	1.93258	1.4454	2.17726	2.19437	2.06769	1.9756	2.27474	2.17268	2.27474	1.93258
	Minimum limit	1.60494	0.404959	1.53719	0.471074	1.70248	0.338843	1.50413	1.42149	0.471074	1.42149	0.256198	1.60331	1.52	0.256198	1.47107	1.60331	0.404959	0.454545	1.60331	0.256198	0.256198	0.553719	1.53719	0.256198	1.40496	0.404959	1.42149	0.553719	0.454545	0.504132	0.404959	1.60331	1.47107	1.40496	0.53719	1.70248	1.68	0.46	0.404959	-0.694215	1.20661	1.60331	1.50413	0.28	1.30579	1.30579	1.30579	0.404959
Total indicators	Mode	2
	Mean	2
	Median	0.71903
	Standard deviation	0.644423
	Mean desviation	0.517005
	Variance	0.517005
	Coefficient of variation	0.322212
	Maximum limit	1.35558
	Minimum limit	1.23603
Community weighting using the mode
Answer		Percentage
Nothing important	3	0.06
Something important	15	0.3
Very important	32	0.64
Total	50	1
[truncated: 2 more columns]

## Sheet: P.Norte 
		Indicator Code
	Paso del Norte id	I1	I2	I3	I4	I5	I6	I7	I8	I9	I10	I11	I12	I13	I14	I15	I16	I17	I18	I19	I20	I21	I22	I23	I24	I25	I26	I27	I28	I29	I30	I31	I32	I33	I34	I35	I36	I37	I38	I39	I40	I41	I42	I43	I44	I45	I46	I47	I48
	36	2	2	2	1	1	1	2	1	2	1	2	2	2	2	2	2	0	1	1	2	0	0	1	1	1	2	2	2	2	2	2	1	0	2	2	0	1	1	1	2	2	1	2	0	2	1	2	2
	37	1	1	1	2	1	1	2	1	1	1	0	1	0	0	0	1	1	0	1	0	1	1	1	1	0	1	0	1	0	1	1	0	0	1	0	0	0	0	1	0	1	1	1	1	1	0	0	0
	38	2	2	2	1	2	2	1	1	1	2	2	1	2	1	2	1	2	0	2	1	0	1	1	1	2	1	2	2	1	1	1	1	0	1	1	1	2	2	2	1	2	0	2	1	2	1	1	1
	39	2	2	2	2	2	2	2	2	2	2	1	2	2	2	2	2	2	2	1	2	2	2	1	1	1	1	2	1	1	1	0	1	2	1	1	1	1	1	1	0	0	0	2	0	0	1	1	0
	40	2	2	2	2	2	2	1	2	2	2	1	2	1	1	1	2	1	2	1	2	2	1	1	1	1	1	1	1	1	1	1	1	2	1	1	1	1	1	0	0	0	0	2	0	0	1	0	0
	41	2	2	2	2	2	2	2	2	2	2	2	0	1	2	1	2	2	2	2	2	2	2	2	2	2	1	1	2	1	1	2	2	2	2	1	2	2	2	2	1	0	2	-	2	2	2	2	2
	42	2	2	2	2	2	2	1	2	0	0	2	2	2	2	2	0	1	2	2	0	2	2	1	2	2	2	0	0	2	0	0	1	1	0	0	1	0	0	0	2	0	1	2	0	-	-	-	-
	43	2	2	1	2	2	2	2	2	2	2	2	2	2	2	2	2	2	2	1	2	2	2	2	1	1	1	2	0	1	2	2	2	2	0	2	2	0	0	0	0	0	0	2	0	0	1	1	0
Each indicator	Mode	2	2	2	2	2	2	2	2	2	2	2	2	2	2	2	2	2	2	1	2	2	2	1	1	1	1	2	2	1	1	2	1	2	1	1	1	1	1	1	0	0	0	2	0	2	1	1	0
	Mean	1.875	1.875	1.75	1.75	1.75	1.75	1.625	1.625	1.5	1.5	1.5	1.5	1.5	1.5	1.5	1.5	1.375	1.375	1.375	1.375	1.375	1.375	1.25	1.25	1.25	1.25	1.25	1.125	1.125	1.125	1.125	1.125	1.125	1	1	1	0.875	0.875	0.875	0.75	0.625	0.625	1.85714	0.5	1	1	1	0.714286
	Median	2	2	2	2	2	2	2	2	2	2	2	2	2	2	2	2	1.5	2	1	2	2	1.5	1	1	1	1	1.5	1	1	1	1	1	1.5	1	1	1	1	1	1	0.5	0	0.5	2	0	1	1	1	0
	Standard deviation	0.353553	0.353553	0.46291	0.46291	0.46291	0.46291	0.517549	0.517549	0.755929	0.755929	0.755929	0.755929	0.755929	0.755929	0.755929	0.755929	0.744024	0.916125	0.517549	0.916125	0.916125	0.744024	0.46291	0.46291	0.707107	0.46291	0.886405	0.834523	0.64087	0.64087	0.834523	0.64087	0.991031	0.755929	0.755929	0.755929	0.834523	0.834523	0.834523	0.886405	0.916125	0.744024	0.377964	0.755929	1	0.57735	0.816497	0.95119
	Mean desviation	0.21875	0.21875	0.375	0.375	0.375	0.375	0.46875	0.46875	0.625	0.625	0.625	0.625	0.625	0.625	0.625	0.625	0.625	0.78125	0.46875	0.78125	0.78125	0.625	0.375	0.375	0.5625	0.375	0.75	0.65625	0.4375	0.4375	0.65625	0.4375	0.875	0.5	0.5	0.5	0.65625	0.65625	0.65625	0.75	0.78125	0.625	0.244898	0.625	0.857143	0.285714	0.571429	0.816327
	Variance	0.125	0.125	0.214286	0.214286	0.214286	0.214286	0.267857	0.267857	0.571429	0.571429	0.571429	0.571429	0.571429	0.571429	0.571429	0.571429	0.553571	0.839286	0.267857	0.839286	0.839286	0.553571	0.214286	0.214286	0.5	0.214286	0.785714	0.696429	0.410714	0.410714	0.696429	0.410714	0.982143	0.571429	0.571429	0.571429	0.696429	0.696429	0.696429	0.785714	0.839286	0.553571	0.142857	0.571429	1	0.333333	0.666667	0.904762
	Coefficient of variation	0.188562	0.188562	0.26452	0.26452	0.26452	0.26452	0.318492	0.318492	0.503953	0.503953	0.503953	0.503953	0.503953	0.503953	0.503953	0.503953	0.541108	0.666273	0.376399	0.666273	0.666273	0.541108	0.370328	0.370328	0.565685	0.370328	0.709124	0.741798	0.569662	0.569662	0.741798	0.569662	0.880917	0.755929	0.755929	0.755929	0.953741	0.953741	0.953741	1.18187	1.4658	1.19044	0.203519	1.51186	1	0.57735	0.816497	1.33167
	Maximum limit	2.22855	2.22855	2.21291	2.21291	2.21291	2.21291	2.14255	2.14255	2.25593	2.25593	2.25593	2.25593	2.25593	2.25593	2.25593	2.25593	2.11902	2.29113	1.89255	2.29113	2.29113	2.11902	1.71291	1.71291	1.95711	1.71291	2.13641	1.95952	1.76587	1.76587	1.95952	1.76587	2.11603	1.75593	1.75593	1.75593	1.70952	1.70952	1.70952	1.63641	1.54113	1.36902	2.23511	1.25593	2	1.57735	1.8165	1.66548
	Minimum limit	1.78125	1.78125	1.625	1.625	1.625	1.625	1.53125	1.53125	1.375	1.375	1.375	1.375	1.375	1.375	1.375	1.375	0.875	1.21875	0.53125	1.21875	1.21875	0.875	0.625	0.625	0.4375	0.625	0.75	0.34375	0.5625	0.5625	0.34375	0.5625	0.625	0.5	0.5	0.5	0.34375	0.34375	0.34375	-0.25	-0.78125	-0.125	1.7551	-0.625	0.142857	0.714286	0.428571	-0.816327
Total indicators	Mode	2
	Mean	1
	Median	0.77022
	Standard deviation	0.676884
	Mean desviation	0.593239
	Variance	0.593239
	Coefficient of variation	0.676884
	Maximum limit	1.67688
	Minimum limit	0.323116
Community weighting using the mode
Answer		Percentage
Nothing important	7	0.14
Something important	16	0.32
Very important	27	0.54
Total	50	1
[truncated: 2 more columns]
